# Supplementary material for: Green and Rapid Hydrothermal Crystallization and Synthesis of Fully Conjugated Aromatic Compounds
Source: PubMed Central journal article supplement (PMC6485404; doi:10.1002/anie.201801277), 2018-07-19
Supplement: ANIE-57-12270-s001.pdf [file ANIE-57-12270-s001.pdf]

## Supporting Information

### **Green and Rapid Hydrothermal Crystallization and Synthesis of Fully Conjugated Aromatic Compounds**

*M. Josef Taublaender, Florian Glöckhofer, Martina Marchetti-Deschmann, and Miriam M. Unterlass\**

anie\_201801277\_sm\_miscellaneous\_information.pdf

## Table of Contents

|                                                                |    |
|----------------------------------------------------------------|----|
| 1 Methods                                                      | 2  |
| 2 Chemicals                                                    | 2  |
| 3 Experimental Details                                         | 3  |
| 3.1 Preliminary Experiments in Non-Stirred Batch Autoclaves    | 3  |
| 3.2 Experiments in Stirred Microwave-Assisted Batch Autoclaves | 3  |
| 3.3 Purification of Perinone                                   | 5  |
| 3.3.1 Attempts to Remove Byproduct <i>via</i> Extraction       | 5  |
| 3.3.2 Removal of Byproduct <i>via</i> Selective Precipitation  | 5  |
| 3.4 LDI HRMS Preparation                                       | 6  |
| 3.5 Crystallization of Perinone, Indigo and Pentacenetrone     | 6  |
| 4 Analysis and Characterization                                | 8  |
| 4.1 ATR-FTIR Measurements                                      | 8  |
| 4.1.1 Crude Perinone and Starting Compounds                    | 8  |
| 4.1.2 Reprecipitated Perinone and Byproduct                    | 9  |
| 4.1.3 Incomplete Perinone                                      | 11 |
| 4.1.4 Oxidative Polymerization Products in Aqueous Supernatant | 12 |
| 4.1.5 Crystallized Perinone                                    | 12 |
| 4.2 NMR Measurements                                           | 14 |
| 4.2.1 Crude Perinone                                           | 14 |
| 4.2.2 Byproduct                                                | 16 |
| 4.2.3 Reprecipitated Perinone                                  | 16 |
| 4.2.4 Incomplete Perinone                                      | 18 |
| 4.2.5 Oxidative Polymerization Products in Aqueous Supernatant | 19 |
| 4.2.6 Crystallized Perinone                                    | 20 |
| 4.2.7 <i>trans</i> -Perinone                                   | 21 |
| 4.2.8 Determining the Byproduct Content in Crude Perinone      | 23 |
| 4.3 LDI HRMS Measurements                                      | 24 |
| 4.4 PXRD Measurements                                          | 25 |
| 4.4.1 Crude Perinone                                           | 25 |
| 4.4.2 Reprecipitated Perinone                                  | 26 |
| 4.4.3 Crystallized Perinone                                    | 29 |
| 4.4.4 <i>trans</i> -Perinone                                   | 30 |
| 4.5 SEM Measurements                                           | 31 |
| 4.5.1 Crude Perinone                                           | 31 |
| 4.5.2 Reprecipitated Perinone                                  | 32 |
| 4.5.3 Crystallized Perinone                                    | 32 |
| 4.5.3 <i>trans</i> -Perinone Before Crystallization            | 33 |
| 4.5.6 <i>trans</i> -Perinone After Crystallization             | 33 |
| 5 Crystallization of Indigo and Pentacenetrone                 | 34 |
| 6 References                                                   | 40 |

## 1 Methods

Attenuated total reflectance Fourier transform infrared (ATR-FTIR) spectra were recorded on a Bruker Tensor 27 working in ATR MicroFocusing MVP-QL with a diamond crystal. Resolution was set to  $4\text{ cm}^{-1}$  and spectra were recorded from  $4000\text{ cm}^{-1}$  to  $600\text{ cm}^{-1}$ .

$^1\text{H}$  and  $^{13}\text{C}$  solution nuclear magnetic resonance (NMR) spectra were recorded on a Bruker Avance DRX-400 spectrometer (400 MHz).

Laser desorption/ionization high resolution mass spectrometry (LDI HRMS) was performed on a Synapt G2 (Waters, Manchester, UK) with a MALDI ion source. The laser power was set to 275 a.u. and mass spectra were acquired at 20 – 1000 amu. High mass accuracy was achieved by using an appropriate lock-mass ( $m/z$  379.0930) after external calibration ( $m/z$  172.0399 – 1673.9319).

Powder X-ray diffraction (PXRD) data was collected with a PANalytical X'Pert Pro multipurpose diffractometer (MPD) in Bragg Brentano geometry operating with a Cu anode at 40 kV, 40 mA. An X-Celerator multichannel detector was used. Samples were ground and mounted as loose powders on silicon single crystal sample holders. The diffraction patterns were recorded between  $5^\circ$  and  $60^\circ$  ( $2\theta$ ) with 69.215 s/step and a step size of  $0.0050134^\circ$ . Sample holders were rotated during the measurement with 4 s/turn.

Scanning electron microscopy (SEM) was carried out with a Quanta 200F FEI microscope. Typically, the samples were measured at 10 kV with a working distance of 7 - 9 mm and spot size 2.0. Prior to imaging, samples were loaded on carbon-coated stubs and coated by sputtering with a 17 nm thick layer of Au/Pd 60/40 alloy with a Quarum Q105T S sample preparation system.

## 2 Chemicals

*o*-Phenylene diamine (*o*-PDA, >98%) was purchased as its dihydrochloride from TCI. Alkaline extraction with ethyl acetate yielded the free diamine *o*-PDA. Naphthalene bisanhydride (NBA, >97%) was purchased from TCI and had to be purified prior to use. The commercially available NBA contained traces of acetic acid (clearly visible in  $^1\text{H}$ -NMR spectrum) and probably other, inorganic impurities. In order to remove them 5 g of NBA were dissolved in 250 mL of 1 M NaOH at room temperature (rt). While cooling in an ice bath naphthalene tetracarboxylic acid (NTCA) was precipitated via dropwise addition of diluted HCl. The residual solution had an intense yellow color indicating that certain impurities were still dissolved. The obtained white, solid product (various hydrates of NTCA) was isolated via centrifugation and dried under high vacuum conditions at  $160^\circ\text{C}$  using an oil bath. As evinced by  $^1\text{H}$ -NMR analysis, the finally obtained beige NBA did not contain acetic acid anymore. *trans*-Perinone (Pigment Orange 43, >94%), indigo (>97%) and pentacenetetrone (>94%) were purchased from TCI and used as received for crystallization experiments.

## 3 Experimental Details

### 3.1 Preliminary Experiments in Non-Stirred Batch Autoclaves

In order to perform the hydrothermal (HT) condensation of NBA and *o*-PDA to yield the target compound perinone both starting compounds (40.2 mg NBA and 32.5 mg *o*-PDA, molar ratio of 1:2,  $c_{\text{eq}} = 0.01$  mol/L) were first placed in a glass liner ( $V_{\text{liner}} = 27$  mL). 15 mL of distilled H<sub>2</sub>O were added and the starting compounds were thoroughly dispersed by intense stirring at rt. After removing the stir bar the liner was placed into a PTFE-lined, non-stirred batch autoclave ( $V_{\text{autoclave}} = 45$  mL). The autoclave was put into an oven, which was preheated to the reaction temperature  $T_{\text{R}}$  of 200 °C, and kept there for the desired reaction time  $t_{\text{R}}$ . The experimental conditions of all performed autoclave experiments are listed in Table S 1. To stop the reaction the autoclave was quickly cooled to rt by quenching with cold tap H<sub>2</sub>O. The obtained phases (a red solid on bottom and an orange, translucent liquid above) were separated *via* filtration and the obtained solid phase was washed with distilled H<sub>2</sub>O and dried in a vacuum desiccator over silica gel blue.

Table S 1: Conditions for preliminary experiments carried out in non-stirred batch autoclaves at  $c_{\text{eq}} = 0.01$  mol/L.

| number | $T_{\text{R}}$ [°C] | $t_{\text{R}}$ [h] | comment    |
|--------|---------------------|--------------------|------------|
| 1      | 200                 | 16                 | complete   |
| 2      | 200                 | 2                  | incomplete |
| 3      | 200                 | 4                  | incomplete |
| 4      | 200                 | 8                  | incomplete |
| 5      | 200                 | 12                 | complete   |
| 6      | 200                 | 48                 | complete   |

### 3.2 Experiments in Stirred Microwave-Assisted Batch Autoclaves

Both starting compounds (107.3 mg NBA and 86.6 mg *o*-PDA, molar ratio of 1:2,  $c_{\text{eq}} = 0.01$  mol/L) were placed in a glass liner ( $V_{\text{liner}} = 60$  mL). 40 mL of distilled H<sub>2</sub>O were added. The starting compounds were dispersed at rt under intense stirring before the liner was placed in a PTFE-lined, stirred batch microwave (MW) vessel ( $V_{\text{vessel}} = 120$  mL). The dispersion was stirred while heating by MW irradiation to the intended  $T_{\text{R}}$  at a defined heating rate. Heating times  $t_{\text{H}}$  (time until  $T_{\text{R}}$  is reached), reaction times  $t_{\text{R}}$  (time for which  $T_{\text{R}}$  is held constantly) as well as certain deviations from the standard procedure are given for all experiments in Table S 2. At the end of the reaction the autoclave was allowed to slowly cool back to rt. Due to the experimental set-up quenching was not possible. Cooling down to rt took approximately 60 min from 200 °C or 80 min from 250 °C. The obtained solid phases were isolated, washed with distilled H<sub>2</sub>O and dried in a vacuum desiccator over silica gel blue.

The above-mentioned deviations from the standard procedure include:

- Variation of  $c_{\text{eq}}$
- Variation of pH by adding HCl (aq.) or NH<sub>3</sub> (aq.)
- Addition of HÜNIG's base ( $c_{\text{eq}} = 3 \text{ mmol/L}$ ) to the dispersion of starting compounds
- Employing an excess (3 eq. instead of 2 eq.) of *o*-PDA
- Degassing of the dispersion of starting compounds prior to the MW experiment by bubbling thoroughly with Ar for 15 min or by applying three consecutive freeze-thaw cycles

Table S 2: Conditions for experiments carried out in stirred MW-assisted batch autoclaves.

| number | $T_{\text{R}}$ [°C] | $t_{\text{H}}$ [min] | $t_{\text{R}}$ [min] | $c_{\text{eq}}$ [mol/L] | other               | comment    |
|--------|---------------------|----------------------|----------------------|-------------------------|---------------------|------------|
| 1      | 200                 | 10                   | 0                    | 0.01                    | -                   | incomplete |
| 2      | 200                 | 10                   | 2                    | 0.01                    | -                   | complete   |
| 3      | 150                 | 10                   | 240                  | 0.01                    | -                   | incomplete |
| 4      | 180                 | 10                   | 60                   | 0.01                    | -                   | incomplete |
| 5      | 180                 | 10                   | 120                  | 0.01                    | -                   | complete   |
| 6      | 250                 | 10                   | 0                    | 0.01                    | -                   | complete   |
| 7      | 250                 | 10                   | 120                  | 0.01                    | -                   | complete   |
| 8      | 250                 | 60                   | 0                    | 0.01                    | -                   | complete   |
| 9      | 250                 | 10                   | 0                    | 0.01                    | pH = 4              | incomplete |
| 10     | 250                 | 10                   | 15                   | 0.01                    | pH = 4              | complete   |
| 11     | 250                 | 10                   | 0                    | 0.01                    | pH = 10             | complete   |
| 12     | 250                 | 10                   | 0                    | 0.005                   | -                   | complete   |
| 13     | 250                 | 10                   | 0                    | 0.03                    | -                   | incomplete |
| 14     | 250                 | 10                   | 15                   | 0.03                    | -                   | complete   |
| 15     | 250                 | 10                   | 15                   | 0.05                    | -                   | complete   |
| 16     | 250                 | 10                   | 0                    | 0.01                    | HÜNIG's base        | complete   |
| 17     | 250                 | 10                   | 0                    | 0.01                    | 3 eq. <i>o</i> -PDA | complete   |
| 18     | 250                 | 10                   | 0                    | 0.01                    | Ar-bubbling         | complete   |
| 19     | 250                 | 10                   | 0                    | 0.01                    | freeze-thaw cycles  | complete   |

An exemplary  $T$ - $t$  profile of a MW-assisted reaction (where  $T_{\text{R}} = 250 \text{ °C}$ ,  $t_{\text{H}} = 10 \text{ min}$  and  $t_{\text{R}} = 2 \text{ min}$ ) is shown in Figure S 1. Since the set-up we used did not allow for controlling the cooling rate, we could not study the parameter cooling time  $t_{\text{C}}$ . Hence,  $t_{\text{C}}$  and the cooling curve had to be estimated.

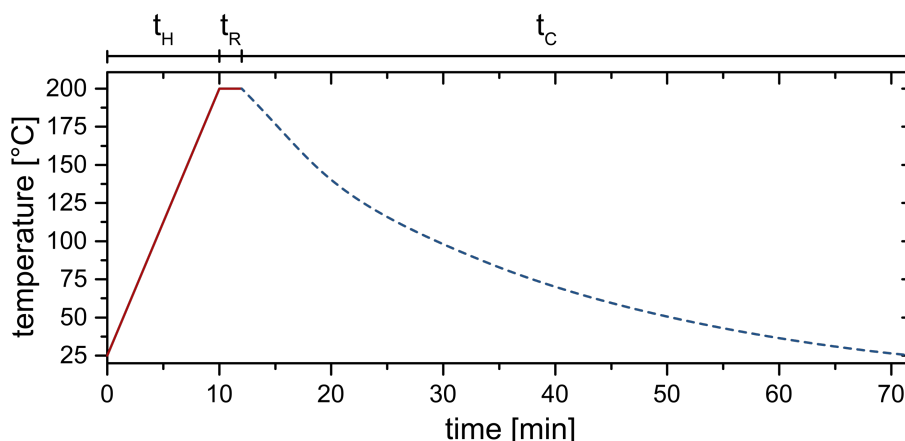

Figure S 1: Exemplary  $T$ - $t$  profile of a MW-assisted perinone synthesis: characteristic times  $t_H$ ,  $t_R$  and  $t_C$  are indicated.  $t_H$  and  $t_R$  could be controlled exactly, whereas  $t_C$  and the cooling curve could only be estimated.

### 3.3 Purification of Perinone

#### 3.3.1 Attempts to Remove Byproduct via Extraction

Approximately 10 mg of finely ground crude perinone were placed in a flask and 10 mL of solvent (petroleum ether, ethyl acetate, acetone, dichloromethane, acetonitrile, toluene, MeOH, EtOH, DMF, DMSO, 1 M aqueous HCl or 1 M aqueous KOH, respectively) were added. In one set of experiments, the slurry was intensively stirred at rt overnight. In another set of experiments the mixture was heated while stirring for 1 h. For none of the tested solvents any dissolution was observed. Perinone was subsequently isolated via centrifugation. In order to remove high boiling solvents (DMF, DMSO) or traces of HCl and KOH prior to analysis, the corresponding solids were washed intensively with distilled  $H_2O$  multiple times. The different samples were dried in a vacuum desiccator over silica gel blue and analyzed by  $^1H$ -NMR and ATR-FTIR spectroscopy. Regarding purity, no changes were observed.

#### 3.3.2 Removal of Byproduct via Selective Precipitation

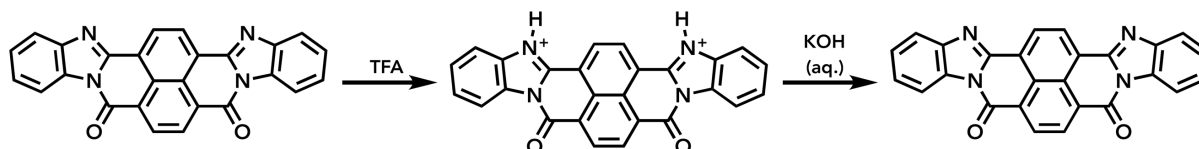

500 mg of crude perinone were dissolved in 50 mL trifluoroacetic acid (TFA). Afterwards, the obtained dark red solution was cooled in an ice bath. Slow and stepwise addition of 50 mL distilled  $H_2O$  led to precipitation of pure perinone.  $H_2O$  was added dropwise in portions of 1 mL to the non-stirred solution. After addition of each portion of  $H_2O$ , the solution was shaken carefully before the next portion of  $H_2O$  was added. The finally obtained phases (a dark red solid and a dark red liquid) were separated via centrifugation. The solid product was intensively stirred in 0.5 M aqueous KOH at rt for 10 min in order to ensure complete deprotonation. After a subsequent washing step with distilled  $H_2O$  the obtained powder was dried in a

vacuum desiccator over silica gel blue.  $^1\text{H-NMR}$  and ATR-FTIR analysis confirmed complete removal of the byproduct (later identified as NMM; see manuscript and section 4). The liquid phase was evaporated to dryness and the obtained solid was intensively washed with aqueous KOH and subsequently distilled  $\text{H}_2\text{O}$  to yield the isolated byproduct fraction after desiccation.

This procedure is strongly exothermic and has to be performed extremely carefully. The TFA solution should be placed in the ice bath for at least 5 min prior to addition of  $\text{H}_2\text{O}$ .

### 3.4 LDI HRMS Preparation

0.3 mg of the isolated byproduct fraction were suspended in  $\text{CHCl}_3$  and subsequently centrifuged at 12 000  $\times g$ . After evaporation of  $\text{CHCl}_3$  500  $\mu\text{L}$  TFA were added and the byproduct was entirely dissolved *via* sonication. 1  $\mu\text{L}$  sample was applied on a stainless-steel sample holder, dried under ambient conditions and directly measured by LDI HRMS.

### 3.5 Crystallization of Perinone, Indigo and Pentacenetrone

165 mg of reprecipitated perinone (after purification *via* selective precipitation,  $c_{\text{eq}} = 0.01\text{mol/L}$ ) were placed in a glass liner ( $V_{\text{liner}} = 60\text{ mL}$ ). 40 mL of distilled  $\text{H}_2\text{O}$  were added and the dark red powder was dispersed at rt under intense stirring before the liner was placed in a PTFE-lined, stirred batch MW vessel ( $V_{\text{vessel}} = 120\text{ mL}$ ). The dispersion was stirred while heating by MW irradiation to a  $T_{\text{R}}$  of 250  $^\circ\text{C}$  at a  $t_{\text{H}}$  of 10 min and held constantly at this  $T_{\text{R}}$  for  $t_{\text{R}} = 15\text{ min}$  and 60 min, respectively. After slowly cooling back to rt the obtained red solid was isolated *via* filtration from the completely clear supernatant, washed with distilled  $\text{H}_2\text{O}$  and dried in a vacuum desiccator over silica gel blue.

Crystallization experiments with commercially available *trans*-perinone, indigo and pentacenetrone were carried out accordingly. For reasons of better comparability, the optimized reaction conditions found for reprecipitated perinone were also applied for these crystallization experiments.

The exact reaction conditions for all crystallization experiments are summarized in Table S 3.

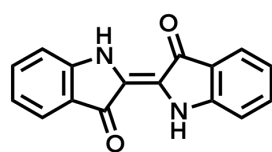

indigo

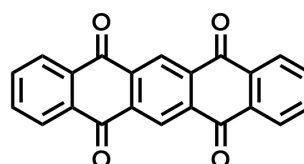

pentacenetrone

Table S 3: Conditions for crystallization experiments with reprecipitated perinone, *trans*-perinone, indigo and pentacenetetrone.

| compound                | $T_R$ [°C] | $t_H$ [min] | $t_R$ [min] | $c_{eq}$ [mol/L] | $m$ [mg] |
|-------------------------|------------|-------------|-------------|------------------|----------|
| reprecipitated perinone | 250        | 10          | 15<br>60    | 0.01             | 165      |
| <i>trans</i> -perinone  | 250        | 10          | 15          | 0.01             | 165      |
| indigo                  | 250        | 10          | 15          | 0.01             | 105      |
| pentacene-tetrone       | 250        | 10          | 15          | 0.01             | 135      |



## 4 Analysis and Characterization

### 4.1 ATR-FTIR Measurements

#### 4.1.1 Crude Perinone and Starting Compounds

In Figure S 2 the ATR-FTIR spectra of crude perinone (synthesized in a non-stirred batch autoclave at  $T_R = 200$  °C for  $t_R = 16$  h) and the starting compounds *o*-PDA and NBA are shown. For better clarity Figure S 3 depicts the ATR-FTIR spectrum solely of crude perinone. We conclude full conversion of the starting compounds, since their typical modes (*o*-PDA:  $\nu_s(\text{N-H}) \approx 3390$   $\text{cm}^{-1}$ ,  $\nu_{as}(\text{N-H}) \approx 3360$   $\text{cm}^{-1}$ ; NBA:  $\nu(\text{C=O})_{\text{NBA}} \approx 1765$   $\text{cm}^{-1}$ ) are not visible anymore. Instead a whole new set of intense modes has evolved, indicating the presence of perinone: most prominently  $\nu(\text{C=O})_{\text{perinone}} \approx 1700$   $\text{cm}^{-1}$  and  $\nu(\text{C=N/C=C}) \approx 1610$   $\text{cm}^{-1}$ ,<sup>i,ii</sup> and also several highly characteristic benzimidazole ring-stretching modes (1450  $\text{cm}^{-1}$ , 1380  $\text{cm}^{-1}$  and 1355  $\text{cm}^{-1}$ ).<sup>iii</sup>

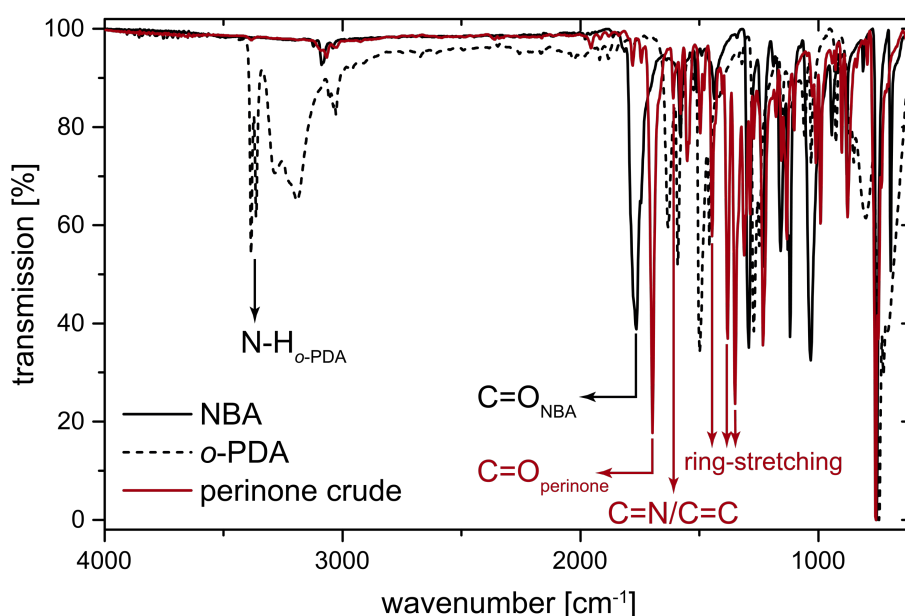

Figure S 2: Superimposed ATR-FTIR spectra of crude perinone (synthesized in a non-stirred batch autoclave at  $T_R = 200$  °C for  $t_R = 16$  h) and the starting compounds *o*-PDA and NBA: characteristic modes of the different compounds are labeled. The absence of characteristic modes of NBA and *o*-PDA (highlighted by black arrows) in the spectrum of crude perinone is an indication for full conversion. Moreover, the crude product's spectrum shows modes (highlighted by red arrows) that are highly indicative for perinone formation, namely  $\nu(\text{C=O})_{\text{perinone}} \approx 1700$   $\text{cm}^{-1}$ ,  $\nu(\text{C=N/C=C}) \approx 1610$   $\text{cm}^{-1}$ , and benzimidazole ring-stretching modes (1450  $\text{cm}^{-1}$ , 1380  $\text{cm}^{-1}$  and 1355  $\text{cm}^{-1}$ ).

The FTIR-ATR spectra of all other crude samples, where maximum conversion of starting compounds was achieved (see Table S 1 and Table S 2), are completely identical to Figure S 3 independent of the experimental set-up used for their preparation (non-stirred batch autoclave or stirred MW-assisted batch autoclave).

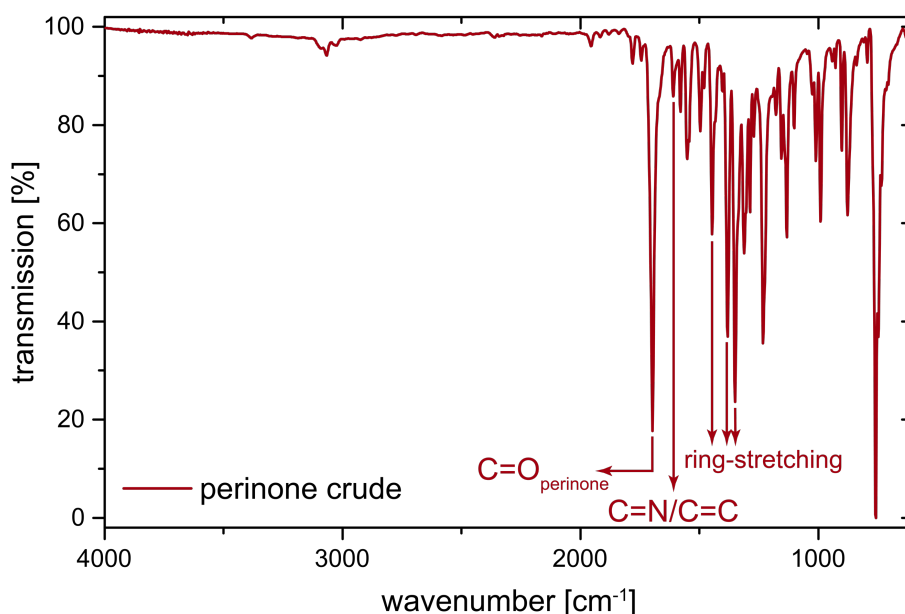

Figure S 3: ATR-FTIR spectrum of crude perinone (synthesized in a non-stirred batch autoclave at  $T_R = 200\text{ }^\circ\text{C}$  for  $t_R = 16\text{ h}$ ): characteristic perinone modes are highlighted:  $\nu(\text{C}=\text{O})_{\text{perinone}} \approx 1700\text{ cm}^{-1}$ ,  $\nu(\text{C}=\text{N}/\text{C}=\text{C}) \approx 1610\text{ cm}^{-1}$  and the characteristic benzimidazole ring-stretching modes ( $1450\text{ cm}^{-1}$ ,  $1380\text{ cm}^{-1}$  and  $1355\text{ cm}^{-1}$ ).

#### 4.1.2 Reprecipitated Perinone and Byproduct

The ATR-FTIR spectrum of pure perinone (obtained via selective precipitation) is depicted in Figure S 4 and only differs slightly from the one of the crude product (Figure S 2): the weak modes at  $1780\text{ cm}^{-1}$  and  $1760\text{ cm}^{-1}$  are missing.

In addition to the ATR-FTIR spectrum of pure perinone, Figure S 4 also shows the spectrum of the byproduct (NMM) separated by selective precipitation. The following characteristic modes (indicated by black arrows in Figure S 4) are present in both spectra - for pure perinone as well as for the obtained byproduct:  $\nu(\text{C}=\text{O})_{\text{perinone}} \approx 1700\text{ cm}^{-1}$ ,  $\nu(\text{C}=\text{N}/\text{C}=\text{C}) \approx 1610\text{ cm}^{-1}$  and characteristic benzimidazole ring-stretching modes ( $1450\text{ cm}^{-1}$ ,  $1380\text{ cm}^{-1}$  and  $1355\text{ cm}^{-1}$ ). This already indicates for the byproduct a structure closely related to perinone, but also some additional modes can be found. The most important, indicative differences between the two spectra (highlighted by blue boxes and letters a and b in Figure S 4 B) are: (i) The byproduct contains modes at  $1780\text{ cm}^{-1}$  and  $1760\text{ cm}^{-1}$ , which lie in the region of C=O stretching modes for anhydrides and are also found in NBA (labeled as a); (ii) and a mode at  $1035\text{ cm}^{-1}$  (labeled as b), which is not only present, but also highly pronounced in NBA's ATR-FTIR spectrum.

Furthermore, the modes at  $2855\text{ cm}^{-1}$  and  $2925\text{ cm}^{-1}$ , the broad mode in the range of  $2950\text{ cm}^{-1}$  to  $3600\text{ cm}^{-1}$  as well as the mode at  $1660\text{ cm}^{-1}$  (shoulder of the intense perinone C=O mode at  $1700\text{ cm}^{-1}$ ) are a lot more pronounced for the byproduct compared to pure and crude perinone, respectively.

The combined results of various analytical techniques (ATR-FTIR,  $^1\text{H-NMR}$  and LDI HRMS) finally allowed to identify the byproduct as naphthalene tetracarboxylic acid monoanhydride monobenzimidazole (NMM, see Figure S 4 A for structure).

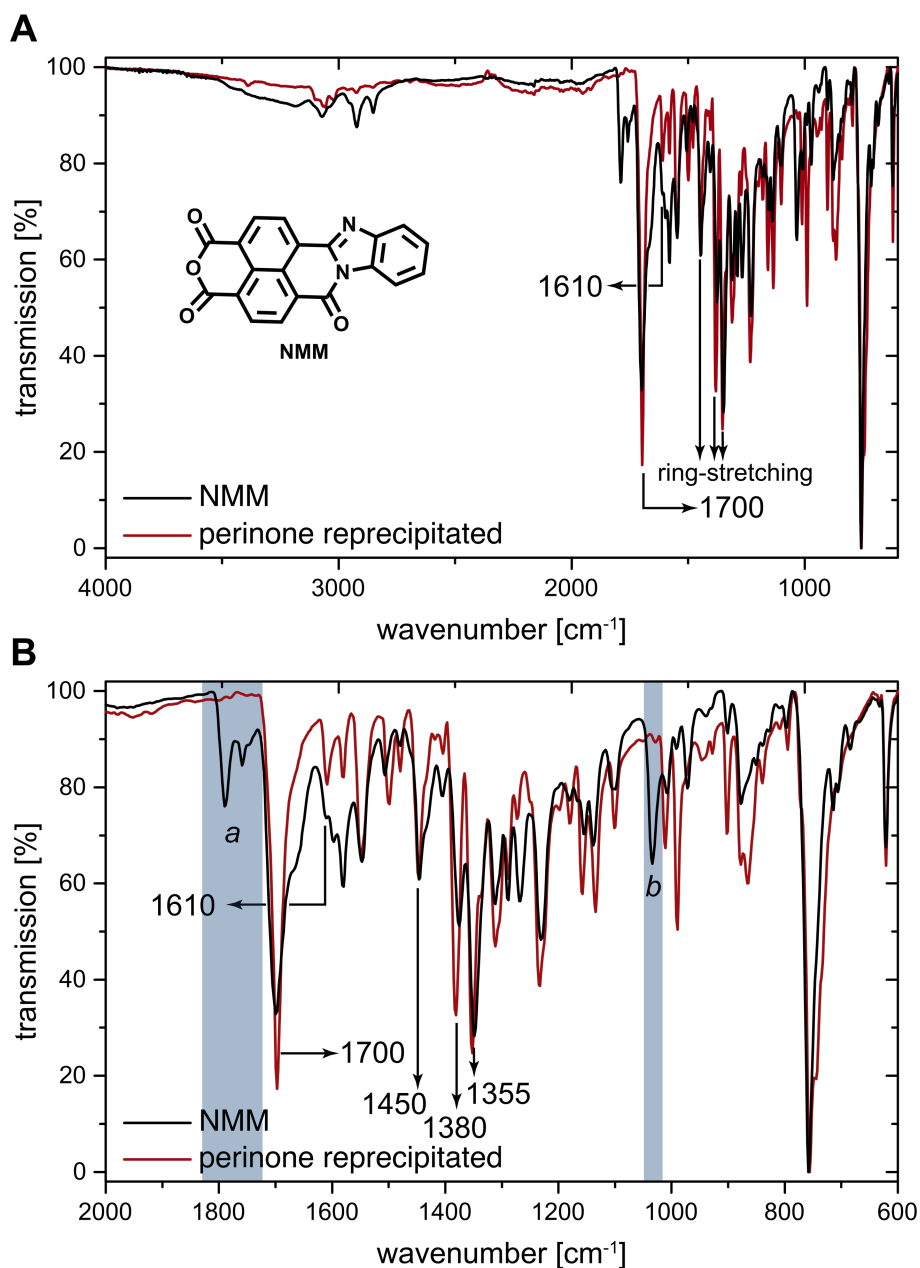

Figure S 4: Superimposed ATR-FTIR spectra of pure perinone and byproduct (A - full spectrum; B - zoom into 2000  $\text{cm}^{-1}$  to 600  $\text{cm}^{-1}$  region): Major differences are highlighted by blue boxes and letters *a* and *b*. Features that both spectra share are indicated with black arrows.

### 4.1.3 Incomplete Perinone

The ATR-FTIR spectrum of the incomplete product synthesized in a non-stirred batch autoclave at  $T_R = 200$  °C for  $t_R = 4$  h is depicted in Figure S 5. An anhydride C=O stretching mode at  $1770\text{ cm}^{-1}$  with two shoulders at  $1760\text{ cm}^{-1}$  and  $1780\text{ cm}^{-1}$  (as in NBA; highlighted by blue box) is clearly present. Due to the intense red color of the obtained product and the presence of all characteristic perinone modes ( $\nu(\text{C}=\text{O})_{\text{perinone}} \approx 1700\text{ cm}^{-1}$ ,  $\nu(\text{C}=\text{N}/\text{C}=\text{C}) \approx 1610\text{ cm}^{-1}$  and the benzimidazole ring-stretching modes at  $1450\text{ cm}^{-1}$ ,  $1380\text{ cm}^{-1}$  and  $1355\text{ cm}^{-1}$ ) we can assume that significant amounts of perinone as well as NMM have already formed. Thus, we can conclude incomplete conversion.

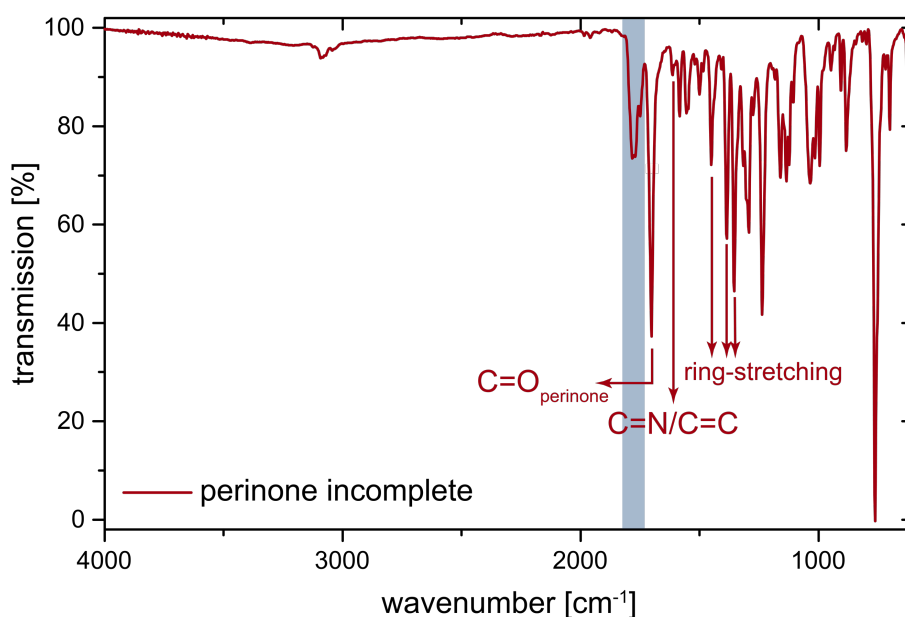

Figure S 5: ATR-FTIR spectrum of the obtained incomplete product synthesized in a non-stirred batch autoclave at  $T_R = 200$  °C for  $t_R = 4$  h: The presence of the anhydride C=O stretching mode at  $1770\text{ cm}^{-1}$  (highlighted by blue box) indicates incomplete conversion of NBA. The characteristic perinone modes are indicated in red.

The FTIR-ATR spectra of all other crude samples, where the conversion of starting compounds was incomplete (see Table S 1 and Table S 2), are very similar to Figure S 5 independent of the experimental set-up used for their preparation (non-stirred batch autoclave or stirred MW-assisted batch autoclave). Depending on  $t_R$ ,  $T_R$  and the corresponding reaction progress, the mode at  $1770\text{ cm}^{-1}$  with its two shoulders at  $1760\text{ cm}^{-1}$  and  $1780\text{ cm}^{-1}$  is more or less intense.

#### 4.1.4 Oxidative Polymerization Products in Aqueous Supernatant

After evaporating the orange, aqueous supernatant phase (that was always found in the glass liner after the HT reaction) to dryness a small amount of dark purple powder was obtained. The corresponding ATR-FTIR spectrum is shown in Figure S 6. Besides characteristic N-H stretching modes and other modes resulting from residual o-PDA (1590  $\text{cm}^{-1}$ , 1495  $\text{cm}^{-1}$ , 1330  $\text{cm}^{-1}$ , 1270 $\text{cm}^{-1}$  and 1160  $\text{cm}^{-1}$ ) also various other signals are found that cannot be exactly assigned but most likely correspond to a vast mixture of oxidation products of o-PDA.

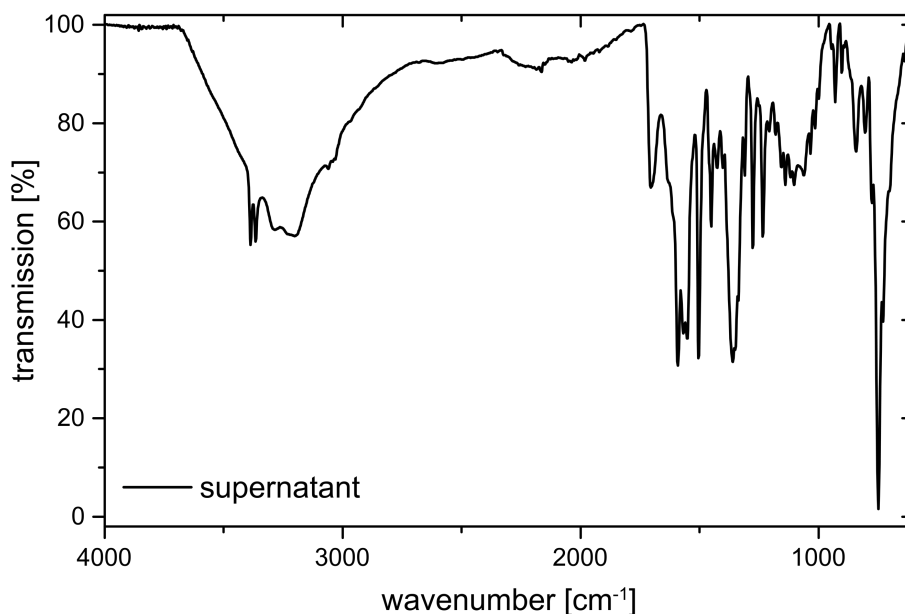

Figure S 6: ATR-FTIR spectrum of the solid residue obtained from evaporating the supernatant, aqueous phase (found in glass liner after the HT reaction) to dryness.

The longer  $t_R$  the less pronounced the N-H stretching modes get due to a proceeding oxidative polymerization of the amino compounds. However, in general, the FTIR-ATR spectra of the solid residues from the liquid supernatant are always very similar to Figure S 6.

#### 4.1.5 Crystallized Perinone

The ATR-FTIR spectrum of crystallized perinone (reprecipitated perinone subjected to HT conditions at  $T_R = 250\text{ }^\circ\text{C}$ ,  $t_H = 10\text{ min}$  and  $t_R = 15\text{ min}$ ) is shown in Figure S 7. The spectrum is completely identical to the spectrum of reprecipitated perinone (Figure S 4), which means that perinone is completely stable under HT conditions (at least for the tested  $t_{RS}$  of 15 min and 60 min). The characteristic NMM modes (at 1760  $\text{cm}^{-1}$  and 1780  $\text{cm}^{-1}$ ) cannot be found.

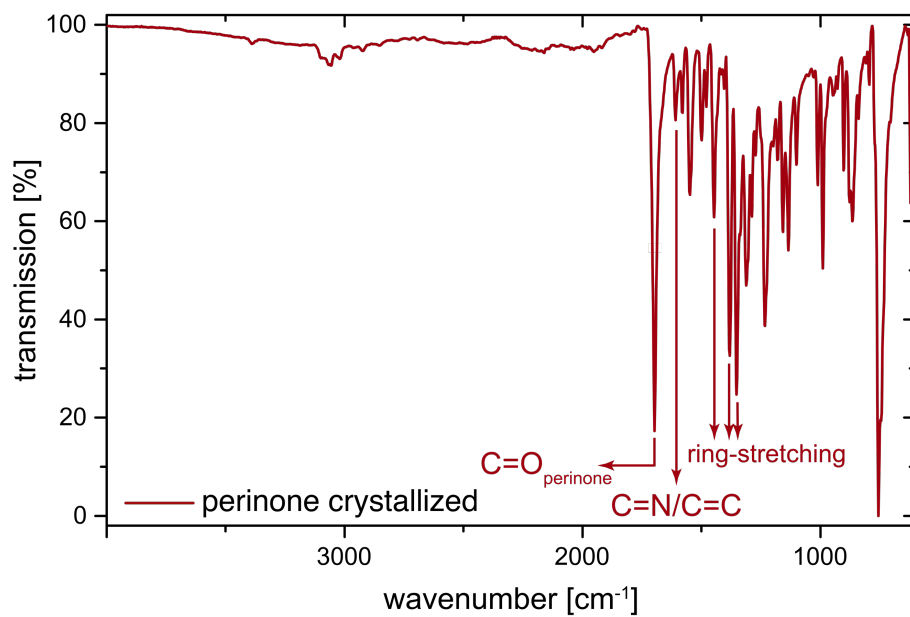

Figure S 7: ATR-FTIR spectrum of crystallized perinone (obtained after HT treatment of reprecipitated perinone at  $T_R = 250\text{ }^\circ\text{C}$ ,  $t_H = 10\text{ min}$  and  $t_R = 15\text{ min}$ ): completely identical to reprecipitated perinone; characteristic NMM modes are not visible.

## 4.2 NMR Measurements

### 4.2.1 Crude Perinone

Figure S 8 A and B depict  $^1\text{H}$ -NMR spectra of crude perinone (synthesized in a non-stirred batch autoclave at  $T_R = 200\text{ }^\circ\text{C}$  for  $t_R = 16\text{ h}$ ). The first spectrum (Figure S 8 A) was measured in a 10:1 deuterio-chloroform ( $\text{CDCl}_3$ ):deuterio-trifluoroacetic acid (dTFA) mixture, whereas the latter one (Figure S 8 B) was recorded in a 1:1 deuterio-benzene ( $\text{C}_6\text{D}_6$ ):dTFA mixture.

From both spectra, it can be clearly seen that crude perinone is composed of a mixture of *cis*- and *trans*-perinone. Especially, in the spectrum recorded in  $\text{C}_6\text{D}_6$ :dTFA 1:1 (Figure S 8 B) one observes two singlets at 8.69 and 9.18 ppm that correspond to the naphthalenic protons of the *cis*-isomer  $\text{H}_d^c$ . The two doublets at 8.95 and 9.11 can be attributed to the *trans*-isomer's naphthalenic protons  $\text{H}_d^t$ . Hence, it is also possible to roughly determine the *cis:trans* ratio of crude perinone, which is approximately 2:3. In the spectrum recorded in  $\text{CDCl}_3$ :dTFA 10:1 (Figure S 8 A) the two signals for the naphthalenic protons  $\text{H}_d^c$  of the *cis*-isomer are only visible as one singlet and additionally overlap with the two doublets of the naphthalenic protons  $\text{H}_d^t$  of the *trans*-isomer.<sup>iv</sup>

Moreover, we observe signals for the benzimidazolic protons  $\text{H}_a$ ,  $\text{H}_b$  and  $\text{H}_c$  in both spectra. In case of the  $\text{C}_6\text{D}_6$ :dTFA 1:1 spectrum the  $\text{H}_c$  protons for the two isomers are separately visible, whereas in  $\text{CDCl}_3$ :dTFA 10:1 they completely overlap. The other benzimidazolic protons  $\text{H}_a$  and  $\text{H}_b$  of the isomers overlap in both spectra. However, the integral values of the different protons do not exactly match the expected values. Furthermore, in addition to the intense signals for *cis*- and *trans*-perinone, also other, rather weak signals (labeled as A, B and B') are found in both spectra that do not correspond to either of the perinone isomers. Since neither the ATR-FTIR spectrum nor the  $^1\text{H}$ -NMR spectrum shows any modes or signals related to unreacted *o*-PDA or NBA, we concluded that these signals must correspond to a byproduct (or a mixture of byproducts), which consequently leads to the above mentioned incorrect integral values. In further consequence, this prevents an exact determination of the *cis:trans*-ratio and only enables the above mentioned estimation of approximately 2:3. The combined results of various analytical techniques (ATR-FTIR,  $^1\text{H}$ -NMR and LDI HRMS) finally allowed to identify the byproduct as NMM. Consequently, it was possible to determine the amount of NMM in crude perinone. The corresponding calculation is explained in subsection 4.2.8.

The  $^1\text{H}$ -NMR spectra of all other crude samples, where full conversion of starting compounds was achieved (see Table S 1 and Table S 2), are completely identical to Figure S 8 independent of the experimental set-up used for their preparation (non-stirred batch autoclave or stirred MW-assisted batch autoclave).

For reasons of comparison, the  $^1\text{H}$ -NMR spectra of commercially available, pure *trans*-perinone are shown in Figure S 16.

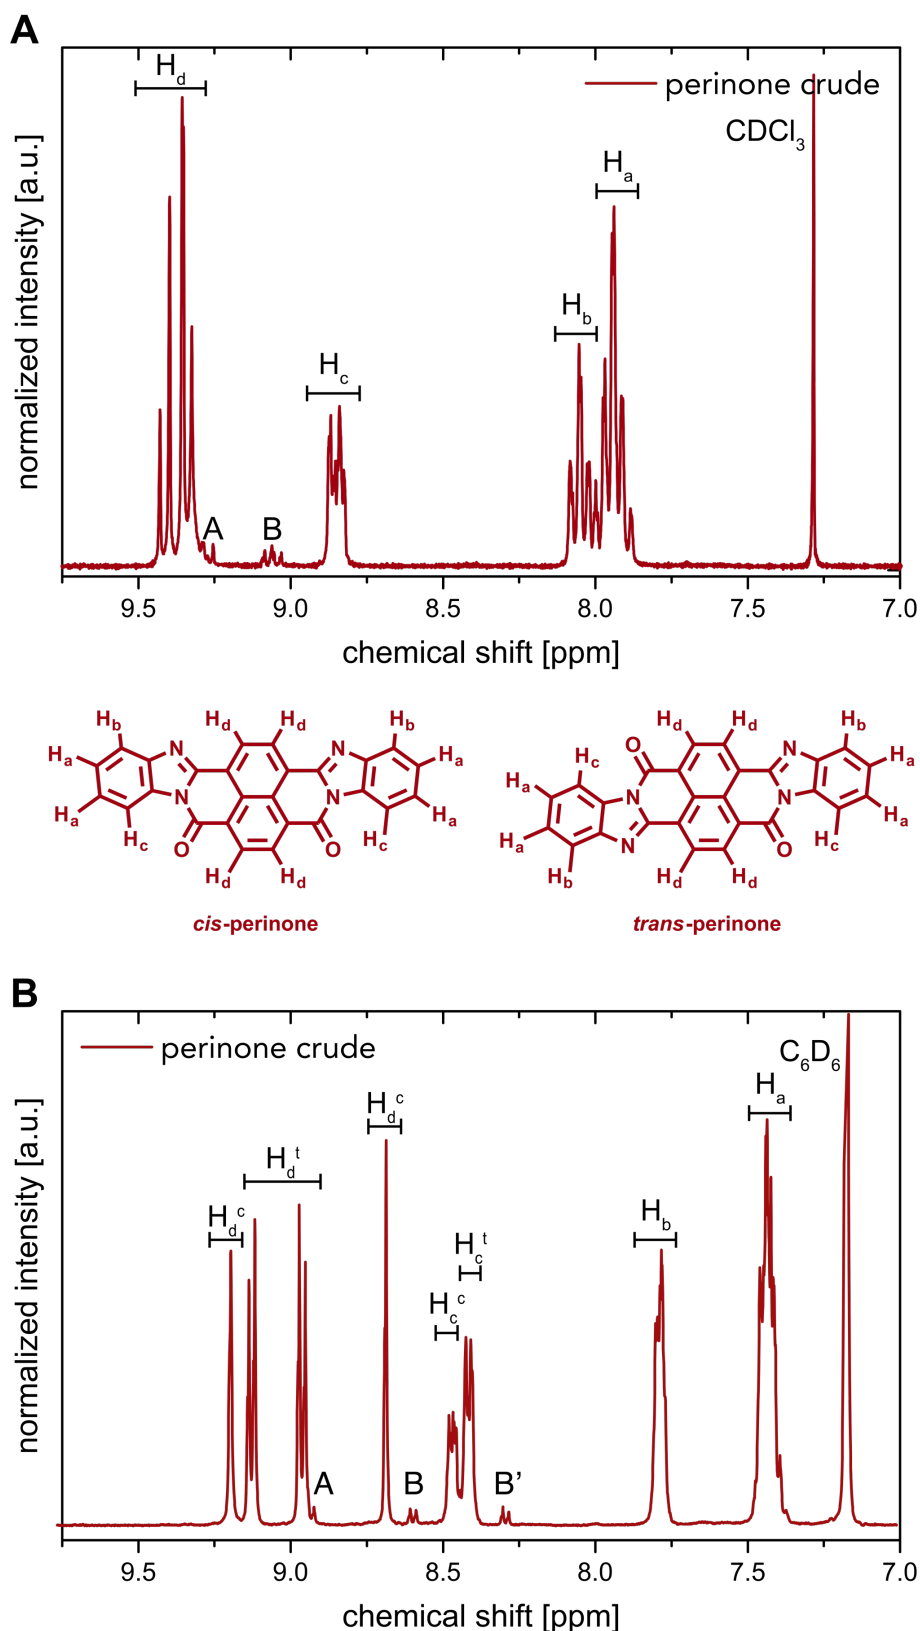

Figure S 8: <sup>1</sup>H-NMR spectra of crude perinone (synthesized in a non-stirred batch autoclave at  $T_R = 200$  °C for  $t_R = 16$  h) and peak assignment for  $H_a$ ,  $H_b$ ,  $H_c$  and  $H_d$ : A - spectrum measured in CDCl<sub>3</sub>:dTFA 10:1: naphthalenic protons  $H_d$  of the isomers overlap; B - spectrum measured in C<sub>6</sub>D<sub>6</sub>:dTFA 1:1: differentiation between naphthalenic protons  $H_d$  of *cis*-isomer ( $H_d^c$ ) and *trans*-isomer ( $H_d^t$ ) is possible, which allows for determining a *cis*:*trans*-ratio of roughly 2:3; both spectra (A and B) show, that crude perinone contains a minor byproduct (signals labeled as A, B and B').



## 4.2.2 Byproduct

In Figure S 9 a superimposition of the  $^1\text{H-NMR}$  spectra of crude perinone (synthesized in a non-stirred batch autoclave at  $T_R = 200\text{ }^\circ\text{C}$  for  $t_R = 16\text{ h}$ ) and the byproduct (NMM; separated *via* selective precipitation) measured in  $\text{CDCl}_3:\text{dTFA } 10:1$  is shown. Both spectra have some signals in common, thus also confirming partial chemical similarity. The main difference are the peaks labeled as  $\text{H}_d$  and  $\text{H}_e$ .

In contrast to crude perinone's spectrum, the multiplets  $\text{H}_d$  and  $\text{H}_e$  (labeled as A and B in Figure S 8) are of major intensity now. These two signals correspond to NMM's naphthalenic unit, whereas the signals  $\text{H}_a$ ,  $\text{H}_b$  and  $\text{H}_c$  can be assigned to the benzimidazolic protons, which is completely in accordance with the spectrum measured for perinone. Furthermore, the fraction isolated as byproduct contains non-negligible amounts of *cis*-perinone (small singlet at 9.4 ppm which is labeled as P; mass confirmed *via* LDI HRMS).

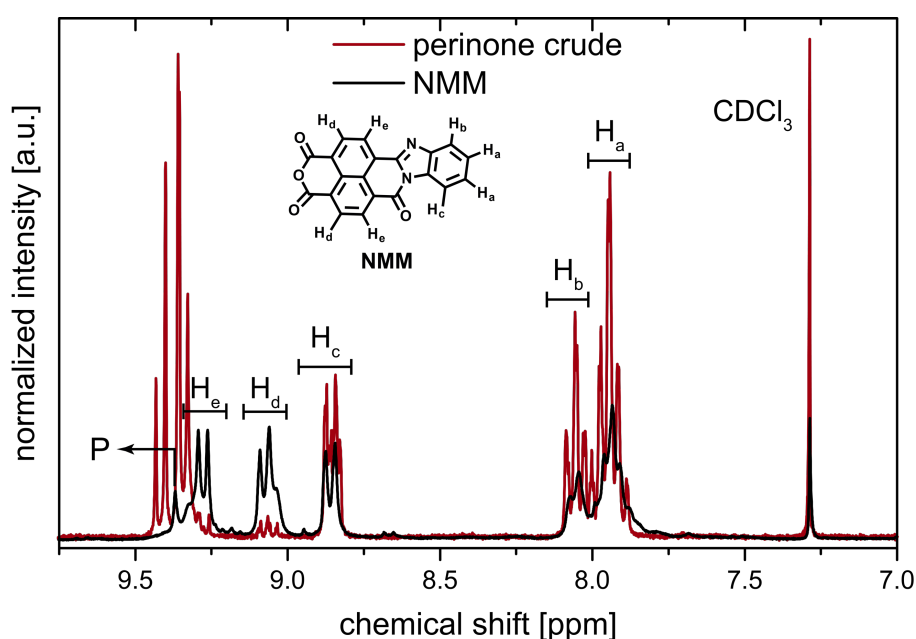

Figure S 9: Superimposed  $^1\text{H-NMR}$  spectra of crude perinone (synthesized in a non-stirred batch autoclave at  $T_R = 200\text{ }^\circ\text{C}$  for  $t_R = 16\text{ h}$ ) and byproduct (separated *via* selective precipitation) measured in  $\text{CDCl}_3:\text{dTFA } 10:1$ ;  $\text{H}_a$ ,  $\text{H}_b$ ,  $\text{H}_c$ ,  $\text{H}_d$  and  $\text{H}_e$  indicate the characteristic NMM signals. The singlet labeled as P can be attributed to residual *cis*-perinone in the obtained byproduct fraction.

## 4.2.3 Reprecipitated Perinone

The  $^1\text{H-NMR}$  spectra of pure perinone (*i.e.* after NMM has been removed *via* selective precipitation) in  $\text{CDCl}_3:\text{dTFA } 10:1$  and  $\text{C}_6\text{D}_6:\text{dTFA } 1:1$  (Figure S 10 A and B) look as expected and also the integral values perfectly fit ( $\int \text{H}_a = 4$ ,  $\int \text{H}_b = 2$ ,  $\int \text{H}_c = 2$  and  $\int \text{H}_d = 4$ ). The spectra in the different solvent mixtures are elucidated in more detail in subsection 4.2.1. The formerly present peaks labeled as A, B and B' in Figure S 8 A and B, which originated from NMM's presence (indicated with black arrows in Figure S 10) have completely vanished. Hence, it can be stated that selective precipitation from TFA with  $\text{H}_2\text{O}$  is an appropriate method for purifying hydrothermally synthesized

perinone. Now it is possible to correctly determine the *cis:trans*-ratio, which is exactly 2:3.

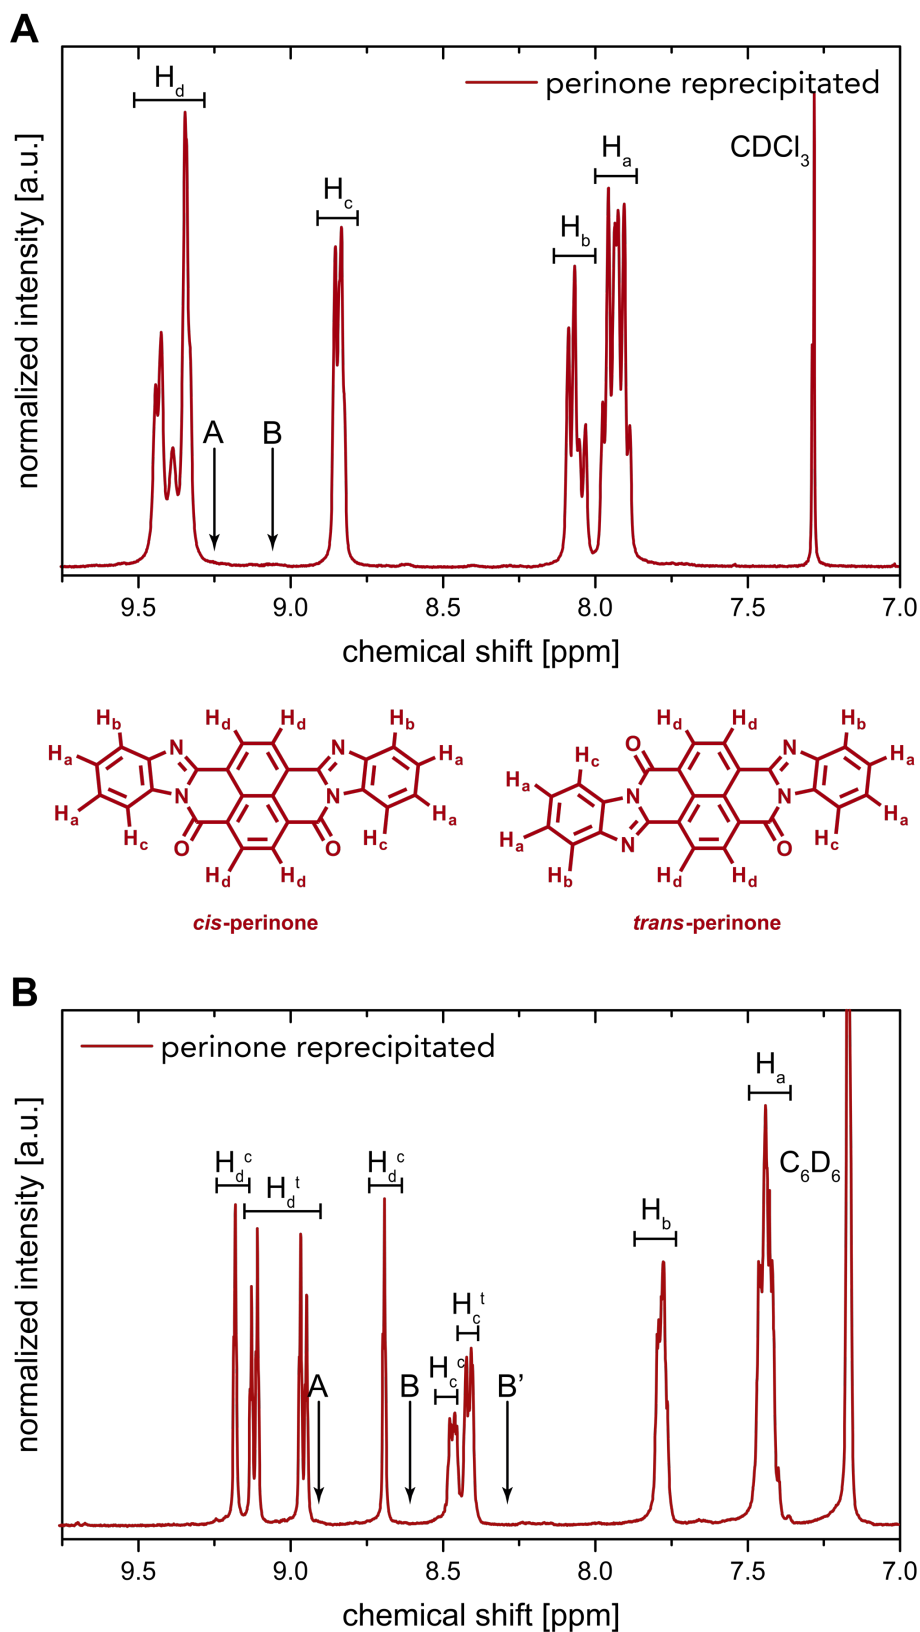

Figure S 10: <sup>1</sup>H-NMR spectra of pure perinone after selective precipitation and peak assignment for H<sub>a</sub>, H<sub>b</sub>, H<sub>c</sub> and H<sub>d</sub>. Previous position of peaks originating from NMM are indicated with black arrows and the letters A, B and B'. The integrals now match the expected values: ∫H<sub>a</sub> = 4, ∫H<sub>b</sub> = 2, ∫H<sub>c</sub> = 2 and ∫H<sub>d</sub> = 4; A - spectrum measured in CDCl<sub>3</sub>:dTFA 10:1; B - spectrum measured in C<sub>6</sub>D<sub>6</sub>:dTFA 1:1: differentiation between naphthalenic protons H<sub>d</sub> of *cis*-isomer (H<sub>d</sub><sup>t</sup>) and *trans*-isomer (H<sub>d</sub><sup>c</sup>) is possible, which allows for determining a *cis:trans*-ratio of 2:3.

The  $^{13}\text{C}$ -NMR spectrum of pure perinone (Figure S 11) is in perfect accordance with the literature.<sup>ii</sup>

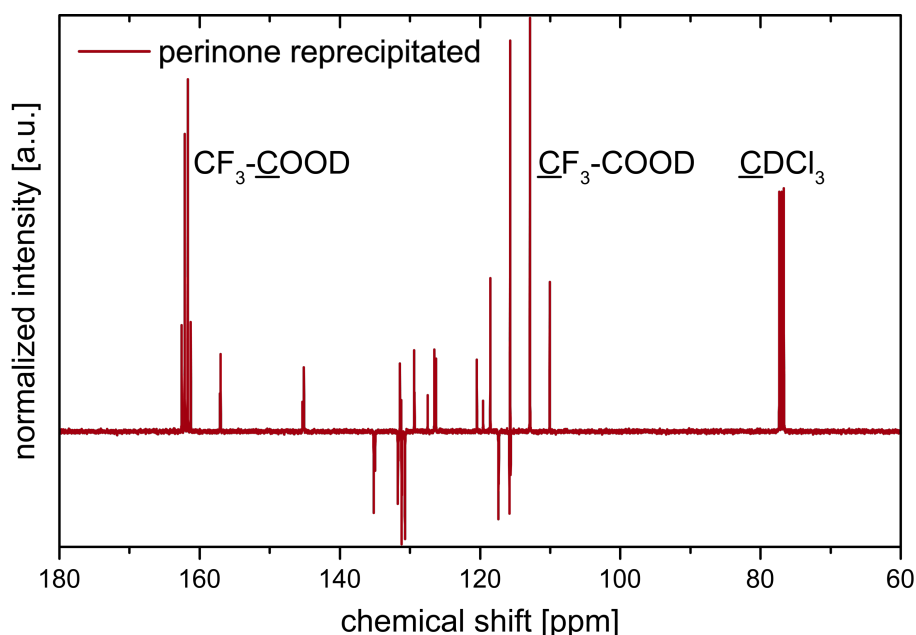

Figure S 11:  $^{13}\text{C}$ -NMR spectrum of pure perinone after selective precipitation measured in  $\text{CDCl}_3$ :dTFA 10:1.

$^1\text{H}$ -NMR:

$\delta$  [ppm] (400 MHz,  $\text{CDCl}_3$ :dTFA = 10:1, mixture of *cis*- and *trans*-perinone) = 9.27 - 9.50 (m, 4 H), 8.78 - 8.89 (m, 2 H), 7.99 - 8.12 (m, 2 H), 7.83 - 7.99 (m, 4 H).

$\delta$  [ppm] (400 MHz,  $\text{C}_6\text{D}_6$ :dTFA = 1:1, *cis*-perinone) = 9.18 (s, 2 H), 8.69 (s, 2 H), 8.43 - 8.50 (m, 2 H), 7.73 - 7.84 (m, 2 H), 7.37 - 7.51 (m, 4 H).

$\delta$  [ppm] (400 MHz,  $\text{C}_6\text{D}_6$ :dTFA = 1:1, *trans*-perinone) = 9.11 (d,  $J=7.80$  Hz, 2 H), 8.95 (d,  $J=7.80$  Hz, 2 H), 8.37-8.35 (m, 2 H), 7.73 - 7.84 (m, 2 H), 7.37 - 7.51 (m, 4 H).

$^{13}\text{C}$ -NMR:

$\delta$  [ppm] (400 MHz,  $\text{CDCl}_3$ :dTFA = 10:1, mixture of *cis*- and *trans*-perinone = 10:1) = 156.96, 156.86, 145.19, 144.98, 135.03, 134.82, 131.59, 131.50, 131.28, 131.12, 131.06, 131.03, 130.60, 130.57, 129.26, 129.20, 127.32, 126.36, 126.17, 126.15, 120.31, 119.43, 117.24, 117.19, 115.68, 115.49.

#### 4.2.4 Incomplete Perinone

The  $^1\text{H}$ -NMR spectra of the incomplete products synthesized in a non-stirred batch autoclave at  $T_R = 200$  °C for  $t_R = 2$  h and 4 h, respectively, are depicted in Figure S 12. It can be clearly seen that besides NMM (peaks labeled as A and B) an additional singlet (highlighted by a blue box) is present in the spectrum, which corresponds to unreacted NBA. Furthermore, it becomes evident that the amounts of NMM and NBA decrease with increasing  $t_R$ .

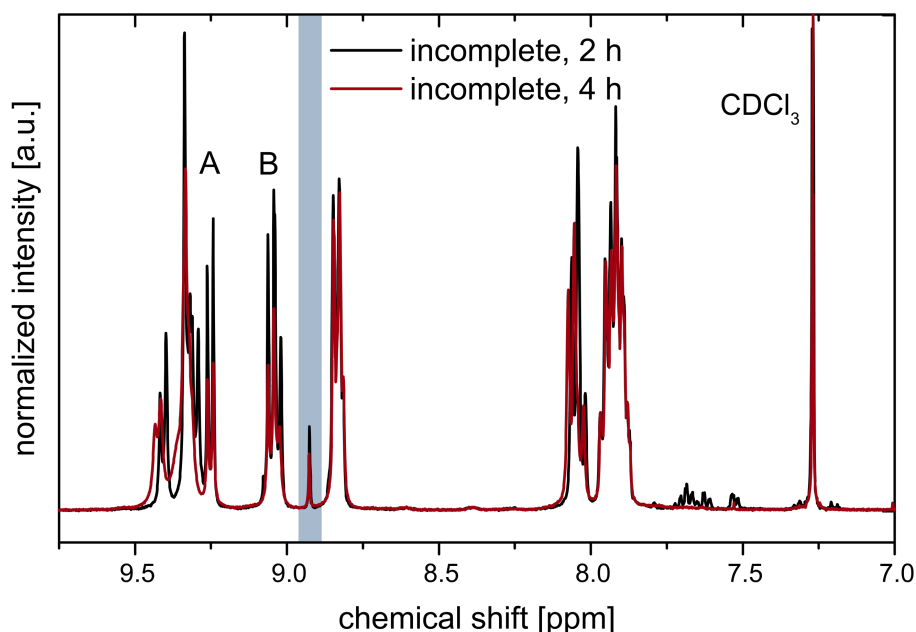

Figure S 12:  $^1\text{H}$ -NMR spectra of incomplete perinone synthesized in a non-stirred batch autoclave at  $T_R = 200\text{ }^\circ\text{C}$  for  $t_R = 2\text{ h}$  and  $4\text{ h}$ , respectively (measured in  $\text{CDCl}_3:\text{dTFA } 10:1$ ): The singlet, which corresponds to unreacted NBA is highlighted by a blue box. The NMM signals labeled as A and B as well as the NBA-singlet (highlighted by blue box) decrease over the course of the reaction.

The  $^1\text{H}$ -NMR spectra of all other crude samples, where the conversion of starting compounds was incomplete (see Table S 1 and Table S 2), are very similar to Figure S 12 independent of the experimental set-up used for their preparation (non-stirred batch autoclave or stirred MW-assisted batch autoclave). Depending on  $t_R$ ,  $T_R$  and the corresponding reaction progress the above mentioned NMM and NBA signals are more or less intense.

#### 4.2.5 Oxidative Polymerization Products in Aqueous Supernatant

After evaporating the orange, aqueous supernatant phase (that was always found in the glass liner after the HT reaction) to dryness a small amount of dark purple powder was obtained. The corresponding  $^1\text{H}$ - and  $^{13}\text{C}$ -NMR spectra are shown in Figure S 13 and Figure S 14, respectively. The multitude of signals in the aromatic regions of both spectra is highly indicative for oxidative polymerization of *o*-PDA.

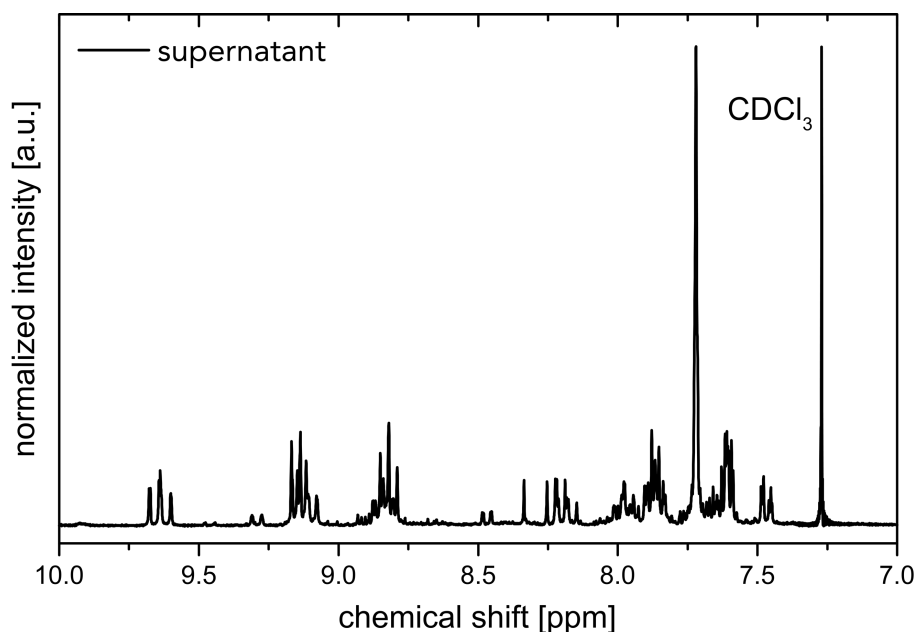

Figure S 13:  $^1\text{H}$ -NMR spectrum (measured in  $\text{CDCl}_3$ :dTFA 10:1) of the solid residue obtained from evaporating the supernatant, aqueous phase (found in glass liner after the HT reaction) to dryness.

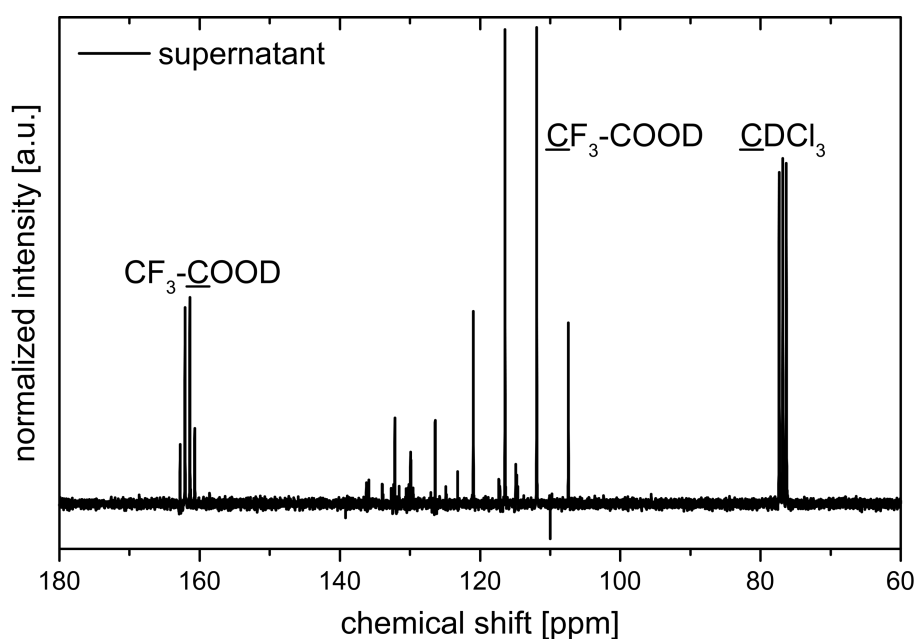

Figure S 14:  $^{13}\text{C}$ -NMR spectrum (measured in  $\text{CDCl}_3$ :dTFA 10:1) of the solid residue obtained from evaporating the supernatant, aqueous phase (found in glass liner after the HT reaction) to dryness.

#### 4.2.6 Crystallized Perinone

The  $^1\text{H}$ -NMR spectra (measured in  $\text{CDCl}_3$ :dTFA 10:1 and in  $\text{C}_6\text{D}_6$ :dTFA 1:1, respectively) of crystallized perinone (reprecipitated perinone subjected to HT conditions at  $T_R = 250\text{ }^\circ\text{C}$ ,  $t_H = 10\text{ min}$  and  $t_R = 15\text{ min}$ ) are shown in Figure S 15. The spectra are completely identical to the ones of reprecipitated perinone (Figure S 10). The characteristic NMM signals (highlighted by A, B and B' in Figure S 8) cannot be found. Furthermore, the *cis:trans*-ratio of 2:3 does not change upon crystallizing.

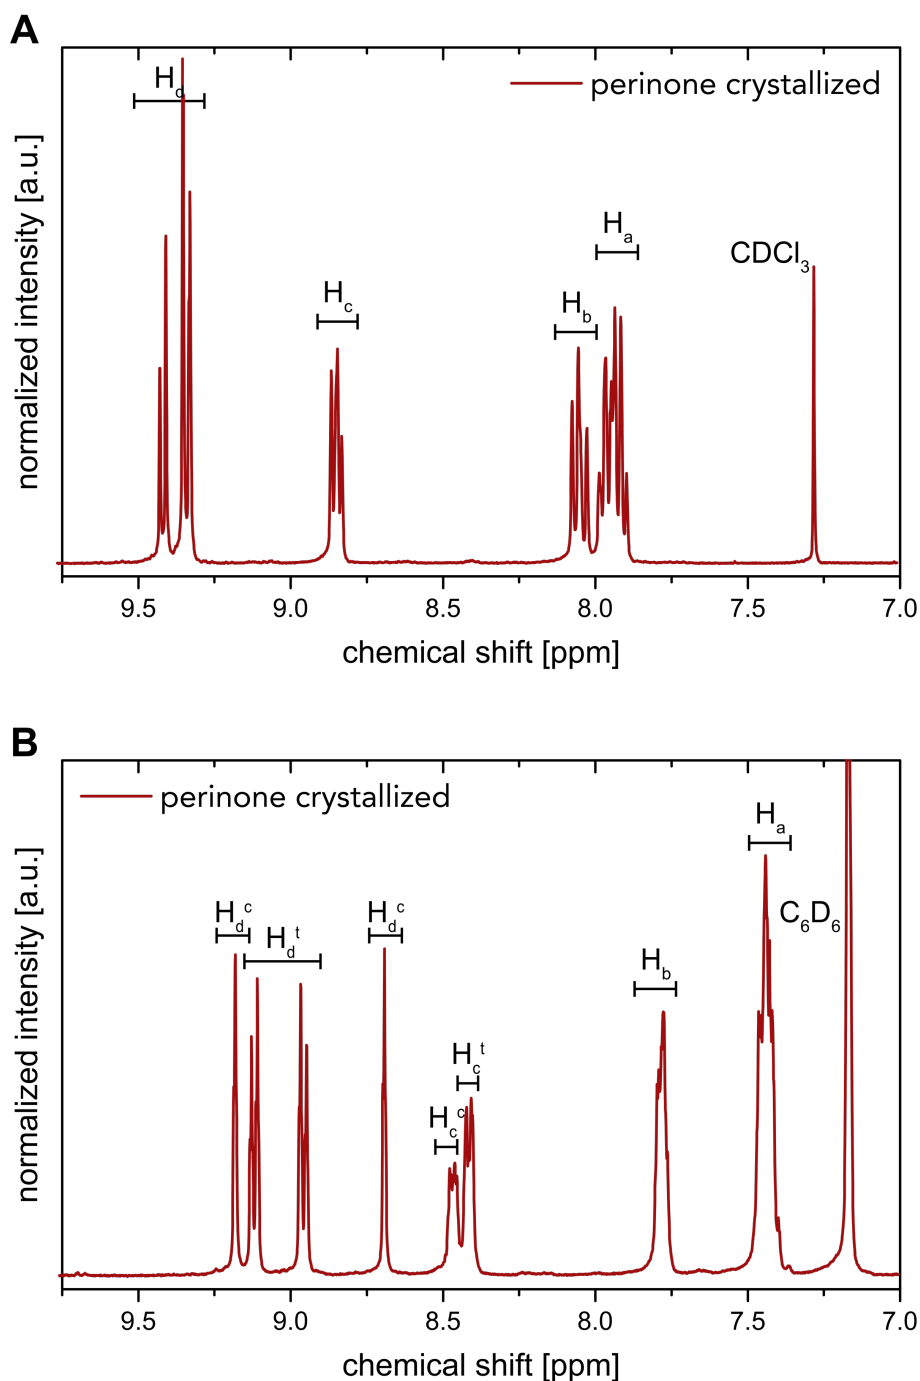

Figure S 15:  $^1H$ -NMR spectra (A - in  $CDCl_3$ :dTFA 10:1; B - in  $C_6D_6$ :dTFA 1:1) of crystallized perinone (obtained after HT treatment of reprecipitated perinone at  $T_R = 250$  °C,  $t_H = 10$  min and  $t_R = 15$  min): completely identical to reprecipitated perinone; NMM signals are not found and *cis:trans*-ratio (2:3) does not change upon crystallizing.

#### 4.2.7 *trans*-Perinone

The  $^1H$ -NMR spectra (measured in in  $CDCl_3$ :dTFA 10:1 and in  $C_6D_6$ :dTFA 1:1, respectively) of commercially available *trans*-perinone (used as received) are shown in Figure S 16. For an explanation of the assignment of  $H_a$ ,  $H_b$ ,  $H_c$  and  $H_d$  see subsection 4.2.1.

Especially in Figure S 16 B one can easily see that the characteristic doublets for the naphthalenic protons  $H_d^t$  at 8.95 and 9.11 ppm are present, whereas the singlets for *cis*-perinone at 8.69 and 9.18 ppm are completely missing.

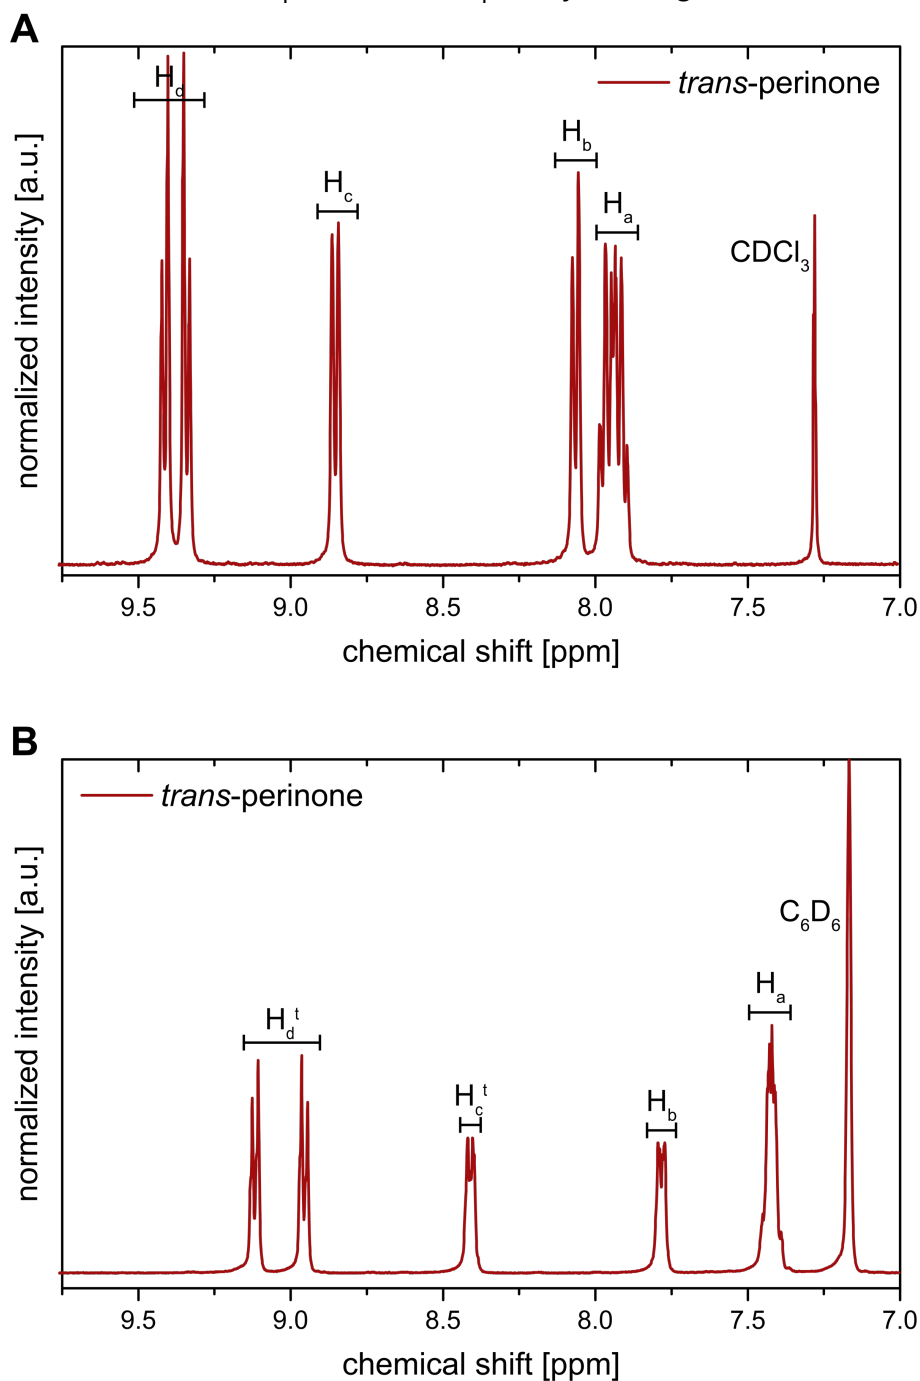

Figure S 16: <sup>1</sup>H-NMR spectra (A - in CDCl<sub>3</sub>:dTFA 10:1; B - in C<sub>6</sub>D<sub>6</sub>:dTFA 1:1) of commercially available *trans*-perinone: characteristic doublets for *trans*-perinone are present, whereas the singlets for *cis*-perinone are completely missing.

The <sup>1</sup>H-NMR spectra of *trans*-perinone after HT crystallization (at  $T_R = 250$  °C,  $t_H = 10$  min and  $t_R = 15$  min or 60 min) are completely identical to the ones measured before HT treatment (depicted in Figure S 16). Since neither changes in the spectra nor in the macroscopic appearance occur, we assume that *trans*-perinone is stable under HT conditions (at least for the examined  $t_R$ s of 15 and 60 min, respectively).

#### 4.2.8 Determining the Byproduct Content in Crude Perinone

The NMM content in crude perinone (synthesized in a non-stirred batch autoclave at  $T_R = 200$  °C for  $t_R = 16$  h) was determined from the  $^1\text{H-NMR}$  spectrum measured in  $\text{CDCl}_3:\text{dTFA}$  10:1. The peaks, which were taken into account are highlighted in Figure S 17 by blue boxes and labeled as X and Y. X corresponds to 4 Hs of perinone (*cis*- and *trans*-isomers) and 2 Hs of NMM, whereas Y only corresponds to 2 Hs of NMM. Hence, it is possible to calculate NMM's concentration (in mol%) in crude perinone using the following equations:

$$\begin{aligned} X &= 2n + 4p \quad \text{and} \quad Y = 2n \\ n &= \frac{Y}{2} \quad \text{and} \quad p = \frac{X - Y}{4} \\ \text{mol\% of NMM} &= \frac{n}{n + p} = \frac{2Y}{X + Y} \end{aligned}$$

where:

$X, Y$  ... values of the appropriate integrals labeled in Figure S 17

$n$ ... mole of NMM

$p$ ... mole of perinone

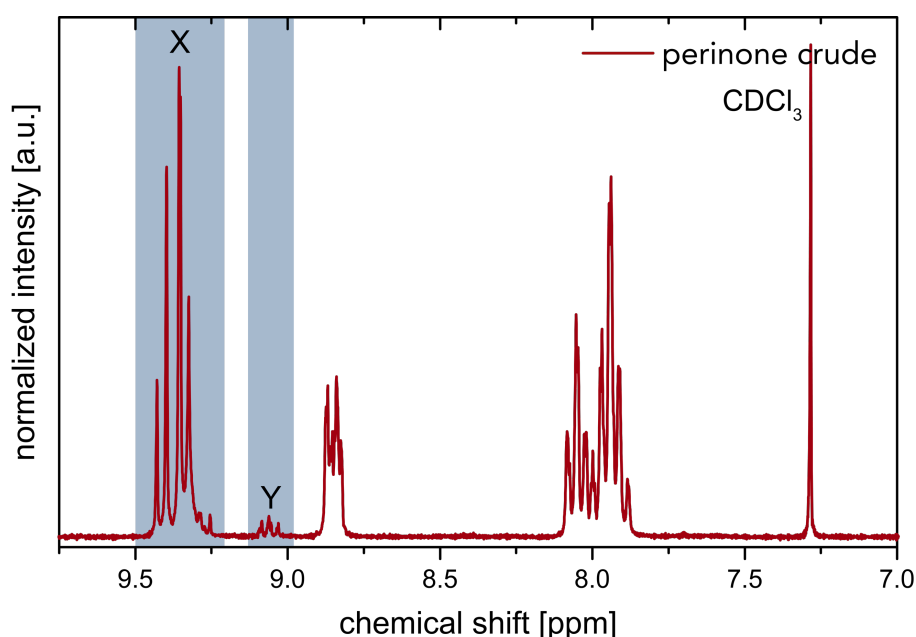

Figure S 17: Illustration of the NMM content determination in crude perinone (synthesized in a non-stirred batch autoclave at  $T_R = 200$  °C for  $t_R = 16$  h) via  $^1\text{H-NMR}$  measured in  $\text{CDCl}_3:\text{dTFA}$  10:1: relevant signals are highlighted by blue boxes and labeled as X and Y.

According to these equations a NMM content of 7 mol% with respect to the total amount of crude product was determined. This value remained approximately constant for all other samples, where full conversion of starting compounds was observed (see Table S 1 and Table S 2).



### 4.3 LDI HRMS Measurements

According to LDI HRMS measurements (Figure S 18) the isolated byproduct fraction (obtained *via* selective precipitation) contains not only NMM ( $m/z$  calculated: 341.06; found: 341.06), but also perinone ( $m/z$  calculated: 413.10; found: 413.11). We assume that only *cis*-perinone is present, but no *trans*-isomer due to the very characteristic singlet in the byproduct's  $^1\text{H-NMR}$  spectrum (see Figure S 9).

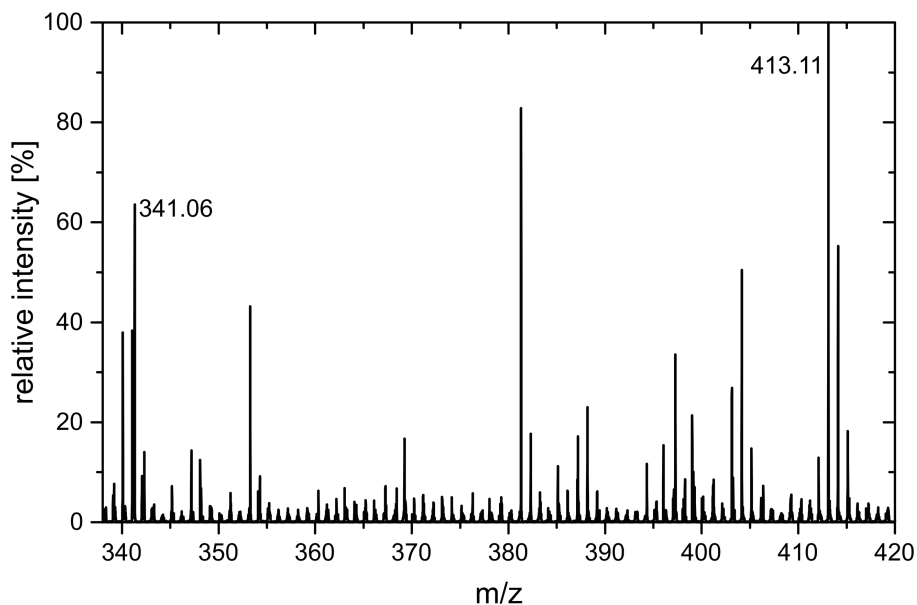

Figure S 18: LDI HRMS spectrum of the isolated byproduct fraction (obtained after selective precipitation): the isolated byproduct fraction contains NMM ( $m/z$  341.06) and *cis*-perinone ( $m/z$  413.11)

## 4.4 PXRD Measurements

### 4.4.1 Crude Perinone

The PXRD pattern of crude perinone (synthesized in a non-stirred batch autoclave at  $T_R = 200$  °C for  $t_R = 16$  h) as well as a simulated pattern derived from the crystal structure of a solid solution of *cis*- and *trans*-perinone are shown in Figure S 19. Hydrothermally synthesized crude perinone is highly crystalline and occurs as a solid solution of *cis*- and *trans*-perinone. All major reflections are found and are perfectly in accordance with the literature.<sup>v</sup>

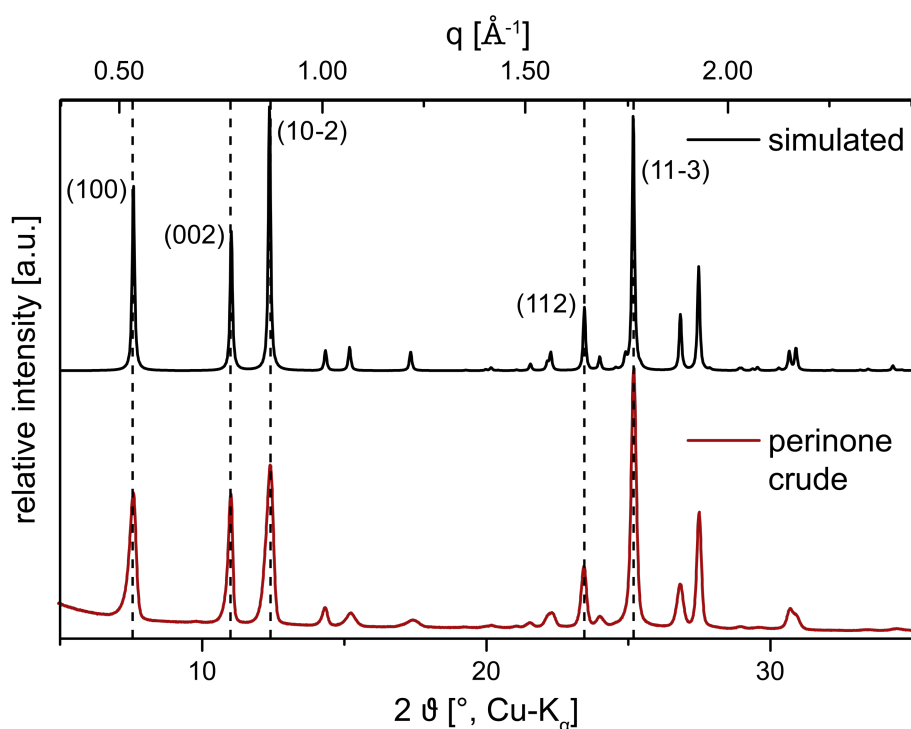

Figure S 19: PXRD pattern of crude perinone (bottom; synthesized in a non-stirred batch autoclave at  $T_R = 200$  °C for  $t_R = 16$  h) and a simulated pattern (top; with major reflections indicated) calculated using the crystal structure of a solid solution of *cis*- and *trans*-perinone from Ref.<sup>v</sup>: crude perinone is highly crystalline and the observed reflections are in perfect agreement with the previously reported pattern of the solid solution.

#### 4.4.2 Reprecipitated Perinone

PXRD measurements revealed that selective precipitation gives rise to a solid that can be described as semi-crystalline at best, whereas crude perinone (before selective precipitation) is highly crystalline (see Figure S 20). The diffractograms of reprecipitated perinone shows 15 reflections (labeled as 1-15 in Figure S 20) between 5 and 35° (2  $\theta$ , Cu-K $\alpha$ ). All reflections are much broader than the reflections in the PXRD pattern of crude perinone (solid solution). Some reflections seem to fit the pattern of crude perinone reasonably well, specifically 1, 4, 5, 10, 11, 12 and 15, however they are off-set; mostly by more than 1° (2  $\theta$ , Cu-K $\alpha$ ). Moreover, the peaks that do not fit at all (2, 3, 6 and 13), are those with the highest intensities.

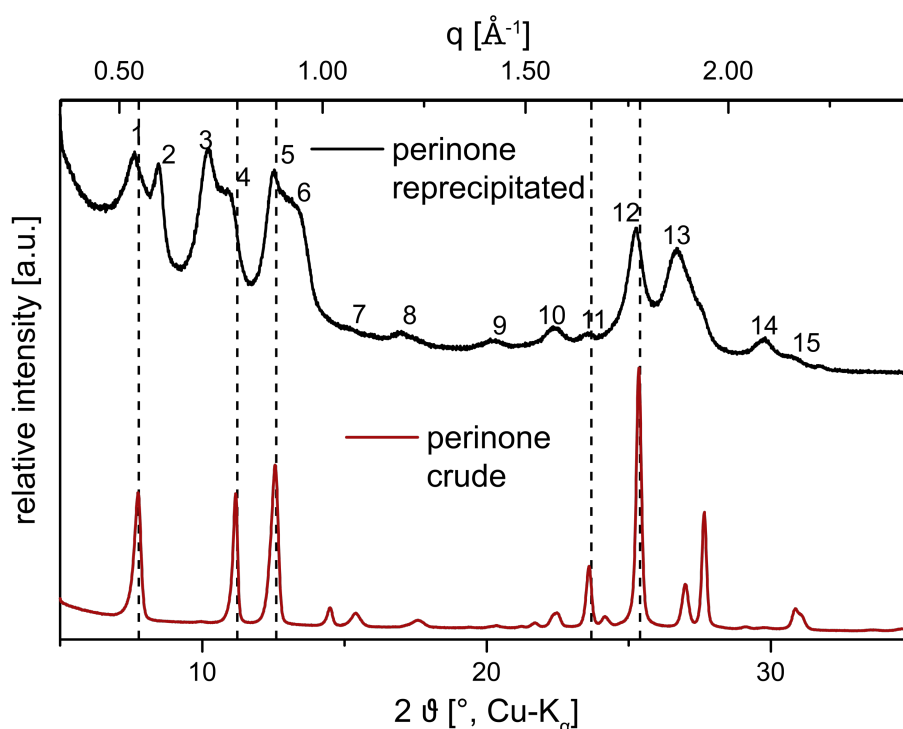

Figure S 20: PXRD patterns of crude (bottom; synthesized in a non-stirred batch autoclave at  $T_R = 200$  °C for  $t_R = 16$  h) and reprecipitated (top) perinone: the selective precipitation procedure significantly decreases crystallinity.

First, we suspected that the diffractogram might be an overlay of *cis*- and *trans*-isomers, resulting from a heterogeneous mixture of very small particles (hence the broad reflections) of separated, pure isomers. This hypothesis seemed reasonable, since reprecipitation is a well-known technique for fractionating e.g. polymers by solubility differences arising from different molecular weights. However, the diffractogram of reprecipitated perinone does also not fit either of the pure isomers (see Figure S 21).

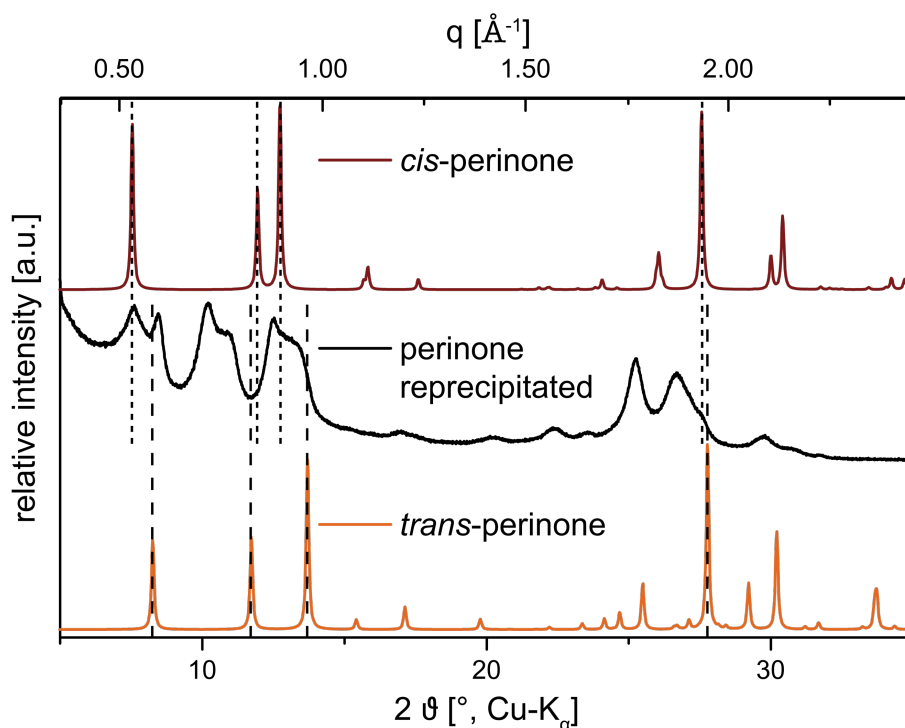

Figure S 21: PXRD pattern of reprecipitated perinone (middle) and simulated patterns for *cis*- (top) and *trans*-perinone (bottom): It can be clearly seen that reprecipitated perinone is not composed of a heterogeneous mixture of the two separated isomers as that would generate a pattern sharing all reflections of both isomers (sum pattern). *cis*- and *trans*-patterns were calculated from the crystal structures from Ref.<sup>vi</sup>

Given that the diffractogram evinces considerable order nonetheless, we moved on to a second hypothesis: The reprecipitation with a non-solvent rapidly quenches the perinone solution, *i.e.* the reprecipitated perinone shows much more disorder than crude perinone in the crystalline state, rather comparable to a liquid crystalline (LC) phase. Considering perinone's molecular geometry (which does not significantly change upon protonation by TFA), it is conceivable that perinone also forms a LC phase: Both *cis*- and *trans*-perinone can be considered discotic mesogens. In fact, both the pure isomers and the solid solution crystallize in  $P2_1/c$ , and exhibit infinite offset face-to-face (OFF)  $\pi$ -stacks in the solid state, which can be considered tilted columns in a columnar LC phase. In further consequence, this leads to ellipsoidal column cross sections. Hence, we would expect perinone in an LC phase to occur as a columnar rectangular mesophase ( $Col_r$ ).  $Col_r$  phases typically assume  $P2_1/a$ ,  $P2/a$  or  $C2/m$  space groups.<sup>vii</sup> We attempted to index the reflections to a rectangular lattice, and all peaks fit relatively well (see Figure S 22), which is why we believe that reprecipitated perinone is indeed well described as highly disordered  $Col_r$  phase.

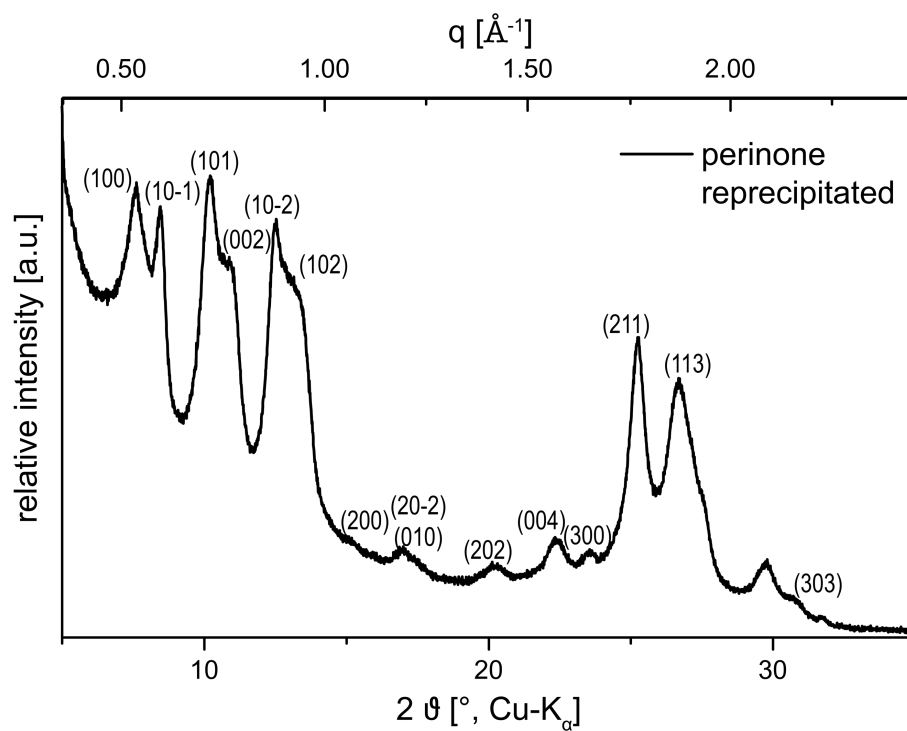

Figure S 22: PXRD pattern of reprecipitated perinone and major reflections indexed to a rectangular lattice in space group  $P2_1/a$ .

### 4.4.3 Crystallized Perinone

The PXRD patterns of crude (synthesized in a non-stirred batch autoclave at  $T_R = 200$  °C for  $t_R = 16$  h), reprecipitated and crystallized perinone (obtained via HT treatment of reprecipitated perinone at  $T_R = 250$  °C,  $t_H = 10$  min and  $t_R = 15$  min) are shown in Figure S 23. Subjecting reprecipitated perinone (Col<sub>r</sub> LC phase; see Figure S 22) to HT conditions significantly increases crystallinity of the product and gives rise to the same solid solution pattern, that was already observed prior to selective precipitation for crude perinone (Figure S 19). Hence, one can state that perinone can indeed be rapidly crystallized hydrothermally.

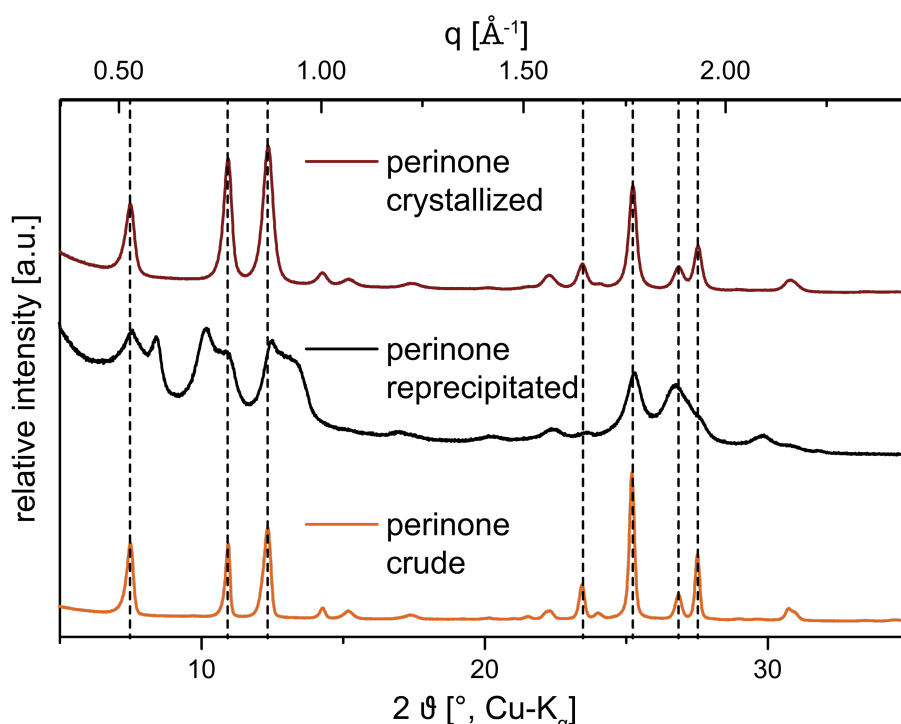

Figure S 23: PXRD patterns of crude (bottom; synthesized in a non-stirred batch autoclave at  $T_R = 200$  °C for  $t_R = 16$  h), reprecipitated (middle) and crystallized perinone (top; obtained via HT treatment of reprecipitated perinone at  $T_R = 250$  °C,  $t_H = 10$  min and  $t_R = 15$  min): crude perinone is highly crystalline, whereas the purified, reprecipitated one is only semi-crystalline. Subsequent HT treatment leads to a highly crystalline product again, which proves that a rapid HT crystallization of perinone is possible.

Extending  $t_R$  of the crystallization to 60 min leads to slightly sharper reflections (compared to the sample prepared at a  $t_R$  of 15 min; shown in Figure S 23), which have the same full width at half maximum as crude perinone.

#### 4.4.4 *trans*-Perinone

The PXRD patterns of commercially purchased *trans*-perinone before (as received) and after crystallization are shown in Figure S 24. Both patterns show the expected reflections.<sup>vi</sup> Furthermore, HT treatment (at  $T_R = 250$  °C,  $t_H = 10$  min and  $t_R = 15$  min) gives rise to slightly sharper and more pronounced reflections, which is why we assume that a crystallization indeed took place.

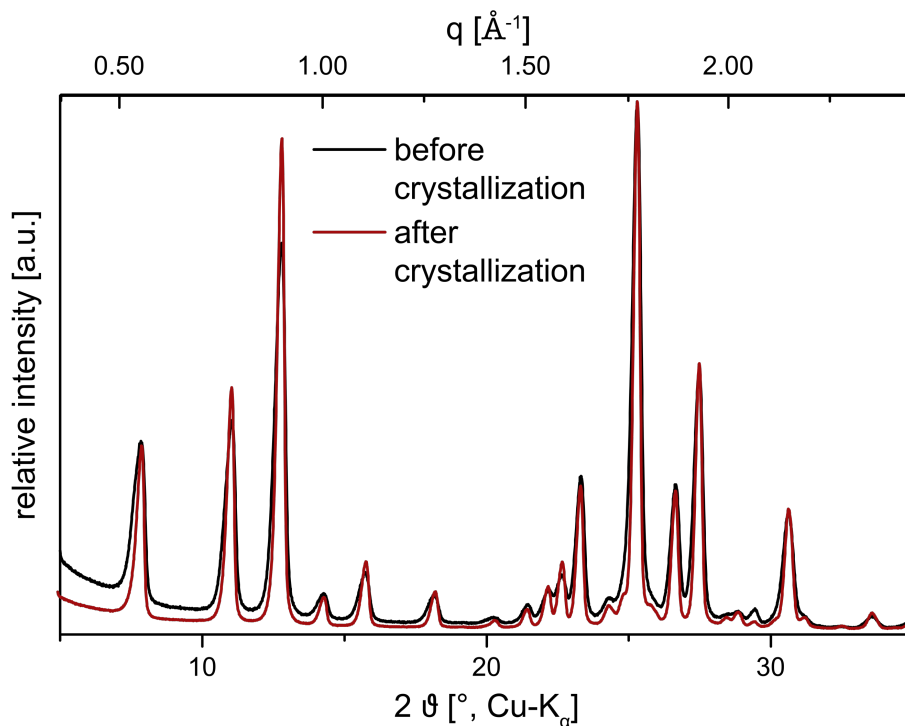

Figure S 24: PXRD patterns of *trans*-perinone before (black) and after (red) crystallization: HT treatment (at  $T_R = 250$  °C,  $t_H = 10$  min and  $t_R = 15$  min) leads to slightly sharper and more pronounced reflections, which is a strong indication that *trans*-perinone can be crystallized hydrothermally.

## 4.5 SEM Measurements

### 4.5.1 Crude Perinone

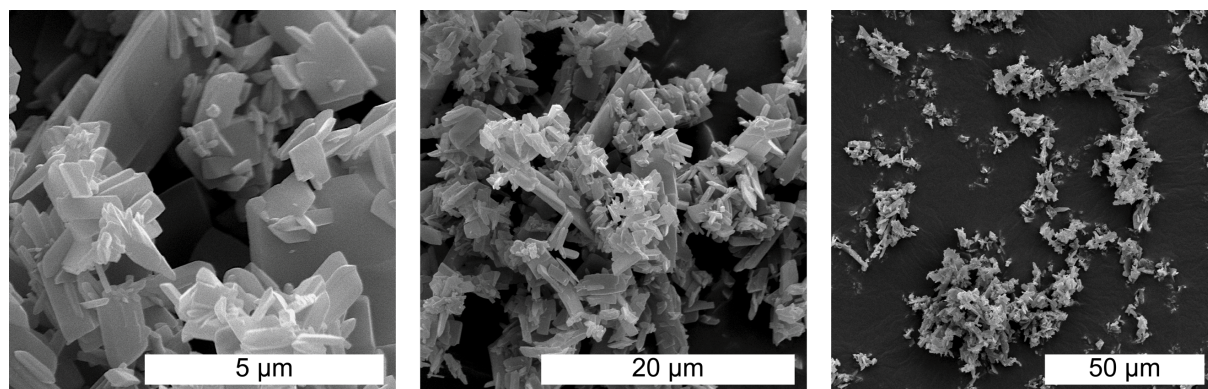

Figure S 25: SEM micrographs of crude perinone (synthesized in a stirred MW-assisted batch autoclave at  $T_R = 250$  °C,  $t_H = 10$  min and  $t_R = 2$  min): crude perinone forms platelates in the size range of 0.5 - 10  $\mu\text{m}$  that are partially intergrown and heavily agglomerated.

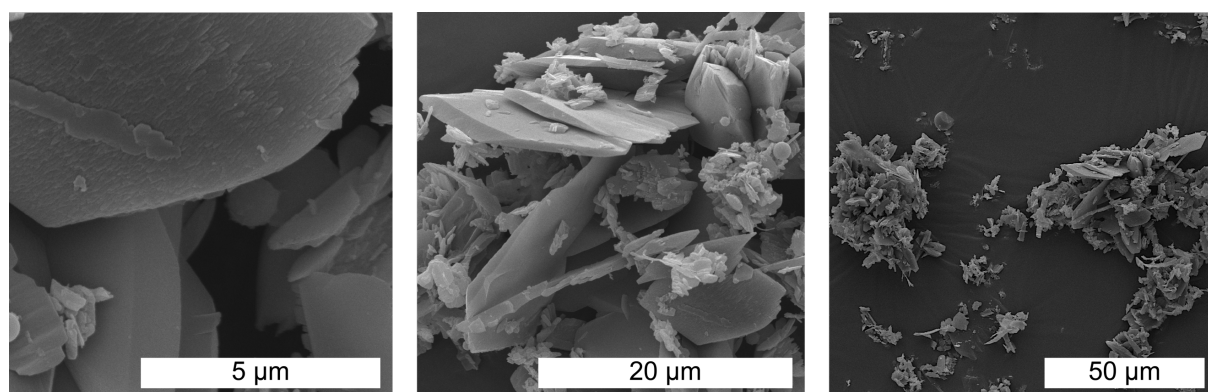

Figure S 26: SEM micrographs of crude perinone (synthesized in a non-stirred batch autoclave at  $T_R = 200$  °C for  $t_R = 16$  h): crude perinone forms platelates in the size range of 2 - 10  $\mu\text{m}$  that are partially intergrown and heavily agglomerated.

Crude Perinone is composed of a mixture of rather flat, angular platelets of rather broad size distribution. Depending of the experimental set-up (non-stirred batch autoclave or stirred MW-assisted batch autoclave) different particle sizes are obtained. In the stirred MW-assisted batch autoclave (at  $T_R = 250$  °C, at  $t_H = 10$  min and  $t_R = 2$  min) particles are typically in the size range of 2 - 10  $\mu\text{m}$  (Figure S 25). In contrast, if perinone is synthesized in a non-stirred batch autoclave (at  $T_R = 200$  °C for  $t_R = 16$  h) typically larger platelates of 5 - 20  $\mu\text{m}$  are obtained. In both cases these platelates are sometimes intergrown. Furthermore, they are mostly agglomerated into bigger structures.

The SEM micrographs of all other crude samples, where full conversion of starting compounds was achieved (see Table S 1 and Table S 2), are very similar to Figure S 25 or Figure S 26, respectively, depending on the experimental set-up (non-stirred batch autoclave or stirred MW-assisted batch autoclave).



#### 4.5.2 Reprecipitated Perinone

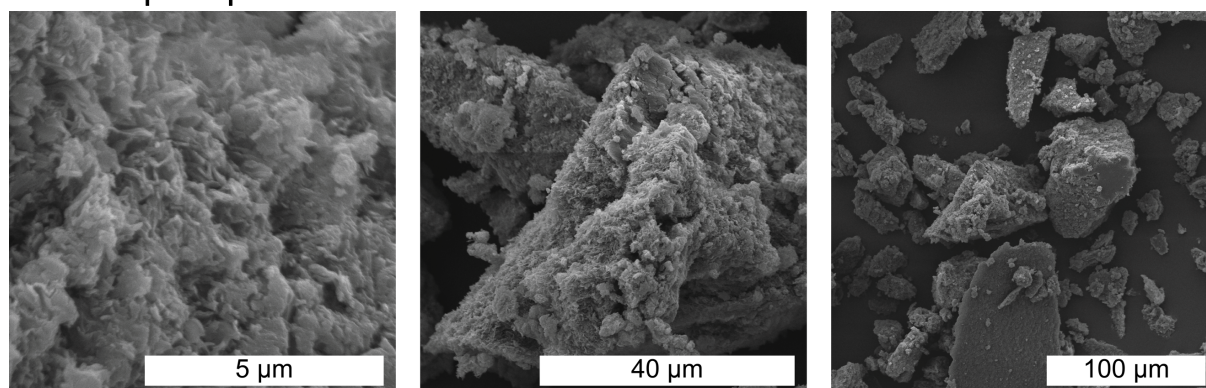

Figure S 27: SEM micrographs of reprecipitated perinone: reprecipitated perinone is composed of heavily agglomerated microparticles (0.1 - 0.5 μm) of random shape with a disordered surface texture.

After reprecipitation the morphology has completely changed. Instead of small particles in the range of 2 - 20 μm (present before reprecipitation, see Figure S 25 and Figure S 26), we observe heavily agglomerated, roundish microparticles (0.1 - 0.5 μm) with a rough random surface. These particles agglomerate into bigger structures of 20 - 200 μm.

#### 4.5.3 Crystallized Perinone

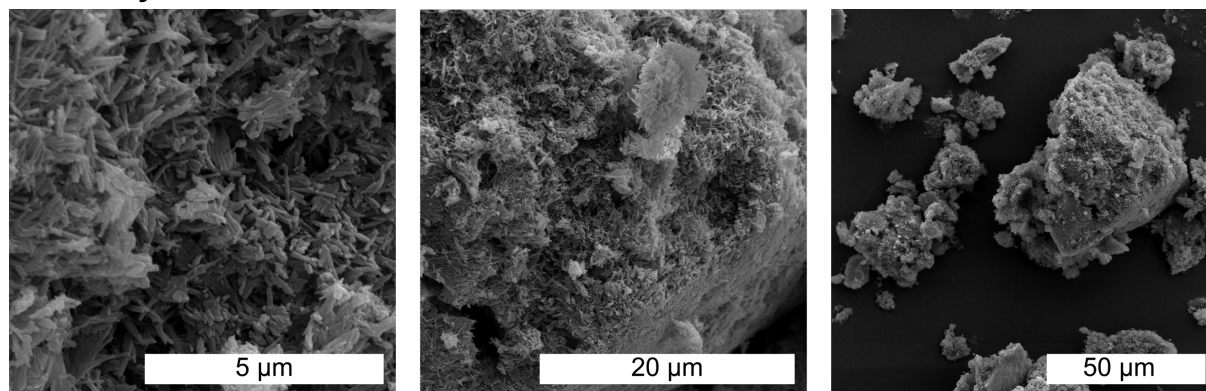

Figure S 28: SEM micrographs of crystallized perinone (obtained via HT treatment of reprecipitated perinone at  $T_R = 250$  °C,  $t_H = 10$  min and  $t_R = 15$  min): crystallized perinone forms agglomerates (10 - 50 μm) of very fine, elongated needles (1 - 2 μm in length).

Crystallization of reprecipitated perinone (at  $T_R = 250$  min,  $t_H = 10$  min and  $t_R = 15$  min) again leads to a significant change in morphology. Crystallized perinone forms very fine needles (Figure S 28), that are heavily agglomerated into bigger structures (10 - 50 μm). The needles are around 1 - 2 μm in length and partially intergrown. Extending  $t_R$  from 15 min to 60 min does not have a significant influence on the observed morphology.

### 4.5.3 *trans*-Perinone Before Crystallization

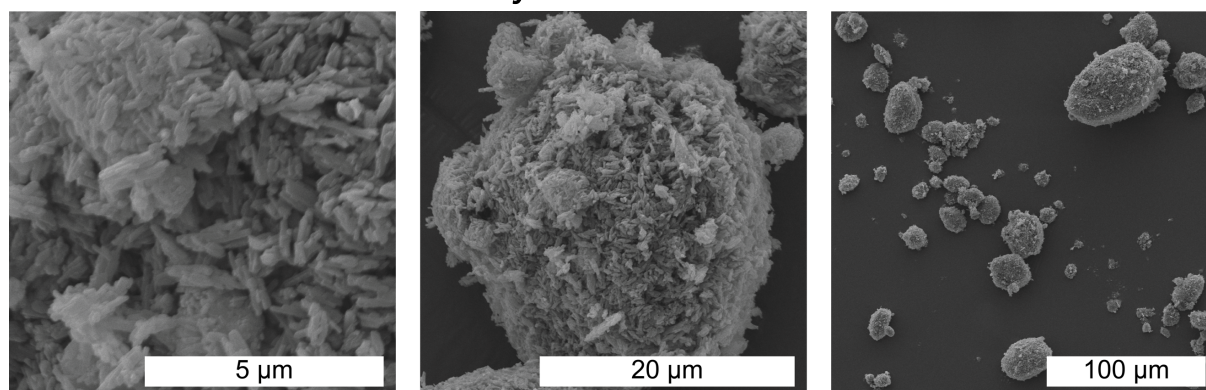

Figure S 29: SEM micrographs of commercially purchased *trans*-perinone before HT treatment: *trans*-perinone is composed of small, short needle-like particles (0.5 - 2 μm in length) that are agglomerated into roundish particles of 10 - 200 μm.

The SEM micrographs of commercially purchased *trans*-perinone (as received, *i.e.* before HT treatment; Figure S 29) show short, poorly pronounced needles, which are between 0.5 μm and 2 μm in length. These small particles agglomerate into almost spherical structures with a broad size distribution (10 - 100 μm).

### 4.5.6 *trans*-Perinone After Crystallization

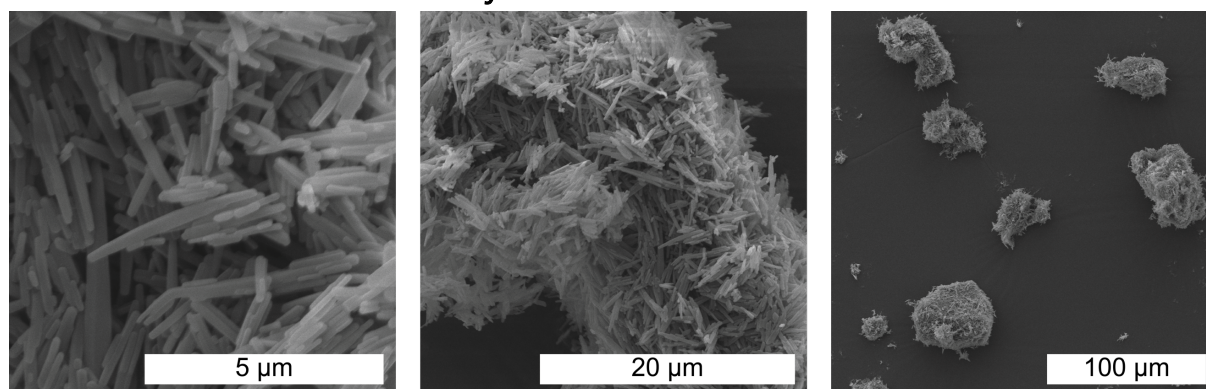

Figure S 30: SEM micrographs of commercially purchased *trans*-perinone after HT treatment: HT crystallization (at  $T_R = 250\text{ }^\circ\text{C}$ ,  $t_H = 10\text{ min}$  and  $t_R = 15\text{ min}$ ) of *trans*-perinone leads to agglomerates of nicely pronounced needles (around 5 μm in length).

HT treatment (at  $T_R = 250\text{ }^\circ\text{C}$ ,  $t_H = 10\text{ min}$  and  $t_R = 15\text{ min}$ ) of commercially purchased *trans*-perinone significantly improves the morphology. In the corresponding SEM micrographs (Figure S 30) we observe agglomerates (10 - 100 μm) of well pronounced needles. These needles are mainly around 5 μm in length and significantly more pronounced than before crystallization. In contrast to the sample prior to HT treatment, here we do not observe perfectly roundish shapes for the agglomerates.

## 5 Crystallization of Indigo and Pentacenetetrone

In order to attempt the HT crystallization of other fully conjugated, aromatic compounds we performed a set of experiments with indigo and pentacenetetrone. We chose these compounds because (i) they have melting points significantly above 250 °C, (ii) they are completely insoluble in H<sub>2</sub>O under ambient conditions and (iii) they are similar as perinone interesting candidates for applications in organic electronics.

For all crystallization experiments with indigo and pentacenetetrone the optimized reaction conditions ( $T_R = 250$  °C,  $t_H = 10$  min and  $t_R = 15$  min) found for the crystallization of reprecipitated perinone were applied.

The ATR-FTIR spectra before and after HT treatment (at  $T_R = 250$  °C,  $t_H = 10$  min and  $t_R = 15$  min) of indigo and pentacenetetrone, respectively, are depicted in Figure S 31 and Figure S 32. As can be clearly seen, HT treatment does not lead to any changes in these spectra. This indicates that indigo and pentacenetetrone are stable (at least for the tested  $t_{RS}$  of 15 min) under HT conditions. Decomposition or degradation does not occur.

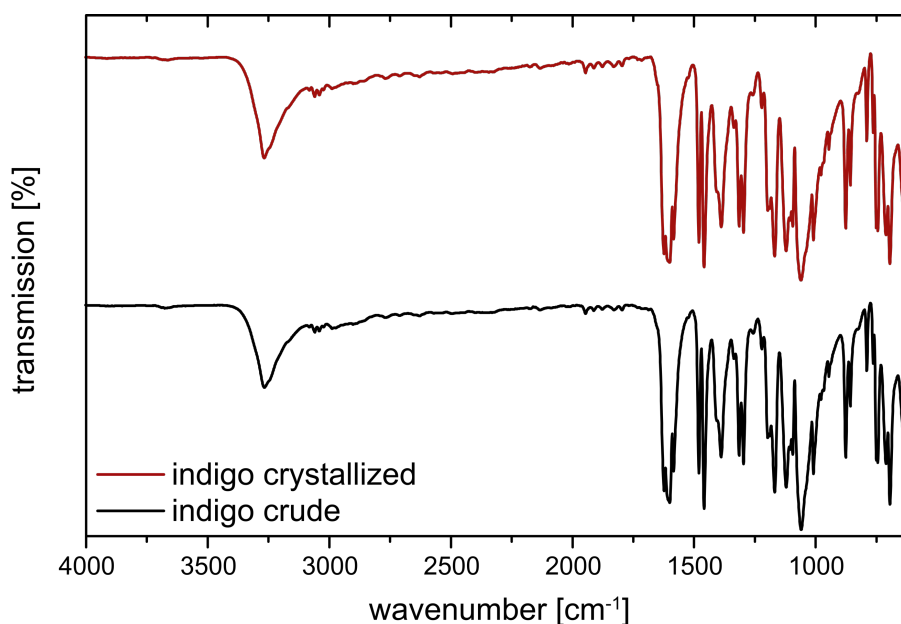

Figure S 31: ATR-FTIR spectra of indigo before and after HT treatment (at  $T_R = 250$  °C,  $t_H = 10$  min and  $t_R = 15$  min): both spectra are identical, which indicates that indigo is stable under HT conditions.

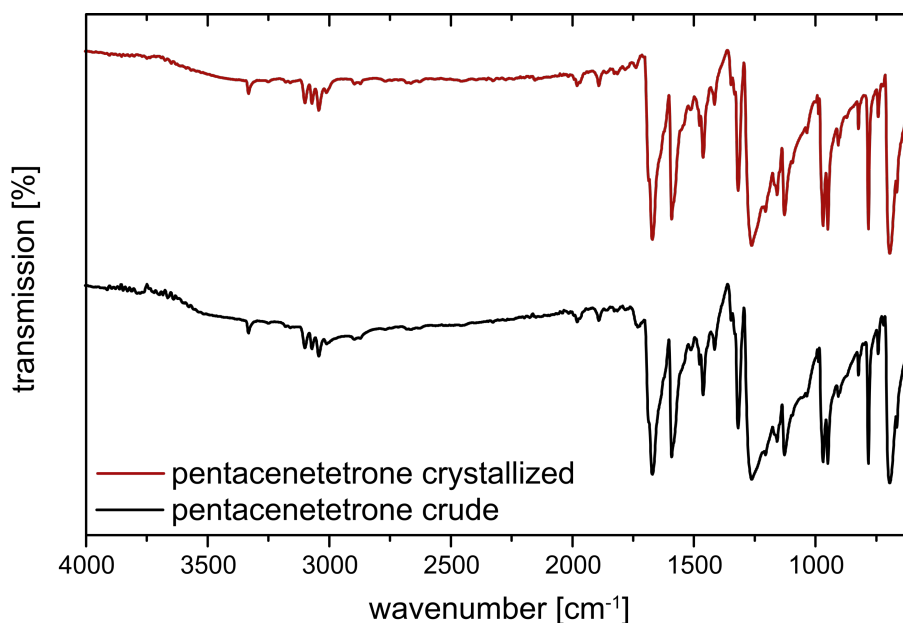

Figure S 32: ATR-FTIR spectra of pentacenetetrone before and after HT treatment (at  $T_R = 250\text{ }^\circ\text{C}$ ,  $t_H = 10\text{ min}$  and  $t_R = 15\text{ min}$ ): both spectra are identical, which indicates that pentacenetetrone is stable under HT conditions.

The  $^1\text{H-NMR}$  spectra before and after HT treatment (at  $T_R = 250\text{ }^\circ\text{C}$ ,  $t_H = 10\text{ min}$  and  $t_R = 15\text{ min}$ ) of pentacenetetrone (Figure S 34) are completely identical, which confirms the above made assumption that it does not decompose (at least at the tested  $t_R$  of 15 min) under HT conditions. Neither new peaks occur nor the integral values change. Due to its extremely poor solubility in  $\text{DMSO-d}_6$  the  $^1\text{H-NMR}$  spectra of indigo (Figure S 33) before and after HT treatment (at  $T_R = 250\text{ }^\circ\text{C}$ ,  $t_H = 10\text{ min}$  and  $t_R = 15\text{ min}$ ) show a bad signal/noise ratio. Nevertheless, one is able to find the corresponding literature signals of indigo in both spectra:<sup>viii</sup>

$^1\text{H-NMR}$ :  $\delta$  [ppm] (400 MHz,  $\text{DMSO-d}_6$ ) = 7.60 (d, 2 H), 7.50 (t, 2 H), 7.32 (d, 2 H), 6.94 (t, 2 H).

However, for the crude (commercially purchased) product additional signals at 6.54 ppm and 7.07 ppm can be found (highlighted by blue boxes), which originate from an unknown impurity. For the crystallized product these signals are significantly less intense. Hence, in the case of indigo HT treatment even allows for removing these.

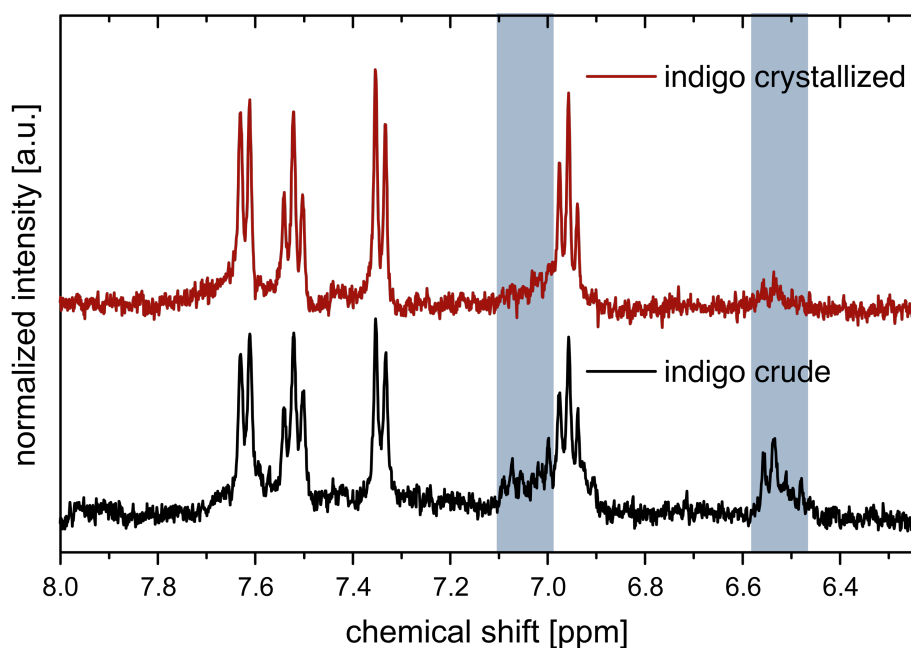

Figure S 33:  $^1\text{H}$ -NMR spectra (measured in  $\text{DMSO-d}_6$ ) of indigo before and after HT treatment (at  $T_R = 250\text{ }^\circ\text{C}$ ,  $t_H = 10\text{ min}$  and  $t_R = 15\text{ min}$ ): crude indigo contains impurities (highlighted by blue boxes); the corresponding signals are significantly decreased after HT treatment.

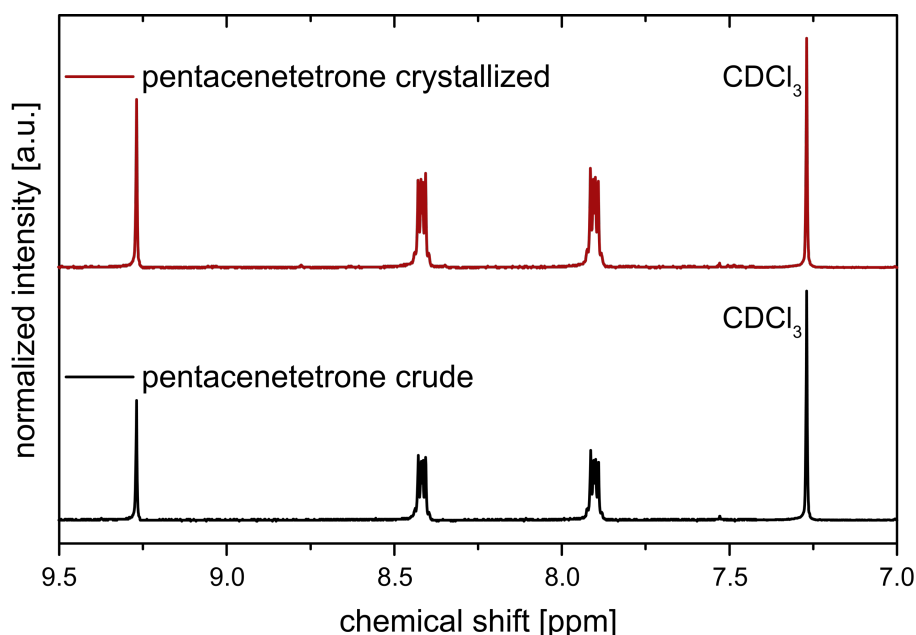

Figure S 34:  $^1\text{H}$ -NMR spectra (measured in  $\text{CDCl}_3$ ) of pentacenetetrone before and after HT treatment (at  $T_R = 250\text{ }^\circ\text{C}$ ,  $t_H = 10\text{ min}$  and  $t_R = 15\text{ min}$ ): both spectra are identical, which indicates that pentacenetetrone is stable under HT conditions.

The PXRD patterns (Figure S 35 and Figure S 36) of the two tested substances (indigo and pentacenetetrone) after HT treatment (at  $T_R = 250\text{ }^\circ\text{C}$ ,  $t_H = 10\text{ min}$  and  $t_R = 15\text{ min}$ ) show the same reflections as the ones before subjecting the compounds to HT conditions. However, this does definitely not mean, that indigo and pentacenetetrone do not dissolve and crystallize within the HT treatment process. Taking a closer look, one can see that HT treatment leads to sharper reflections, which is especially very well visible for pentacenetetrone. This is already a strong indication that indigo and

pentacenetetrone are not only stable under HT conditions, but that also their HT crystallization is indeed possible. Since the commercially purchases compounds are already highly crystalline – which is to be expected for low molecular weight compounds – only a minor increase in crystallinity can generally be achieved.

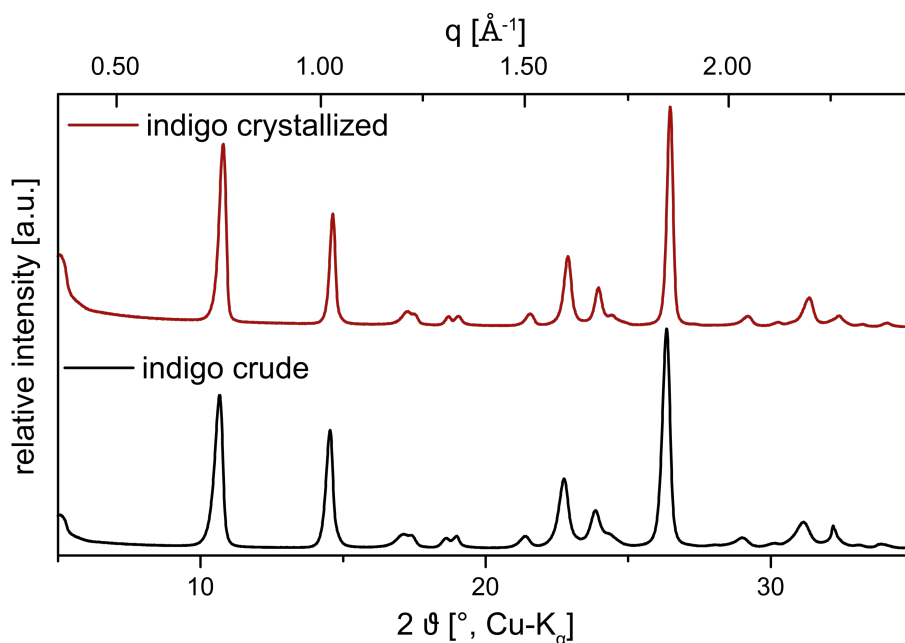

Figure S 35: PXRD patterns of indigo before and after HT treatment (at  $T_R = 250^\circ\text{C}$ ,  $t_H = 10$  min and  $t_R = 15$  min): both diffractograms show the same reflections; HT treatment leads to slightly sharper and more pronounced reflections.

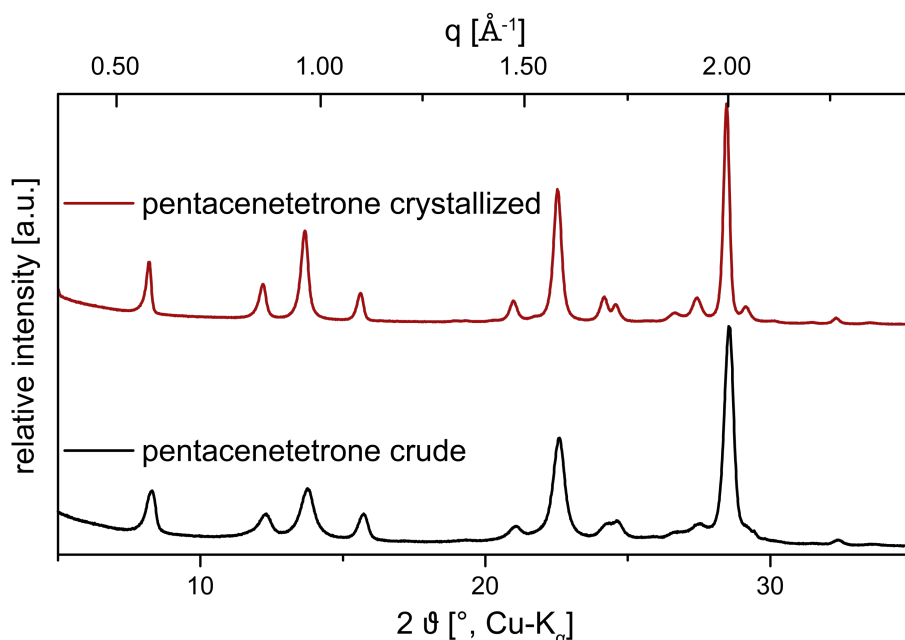

Figure S 36: PXRD patterns of pentacenetetrone before and after HT treatment (at  $T_R = 250^\circ\text{C}$ ,  $t_H = 10$  min and  $t_R = 15$  min): both diffractograms show the same reflections; HT treatment leads to sharper and more pronounced reflections.

In order to completely clarify if it is possible to dissolve and crystallize indigo and pentacenetrone via HT treatment morphologies before and after subjecting the three substances to HT conditions have to be compared.

Figure S 37 shows SEM micrographs of indigo before and after HT treatment (at  $T_R = 250\text{ }^\circ\text{C}$ ,  $t_H = 10\text{ min}$  and  $t_R = 15\text{ min}$ ). Significant morphological differences can be found. The initially present roundish agglomerates of small particles (approximately  $0.5 - 2\text{ }\mu\text{m}$  in length) are transformed into long, well-pronounced, angular needles (around  $20 - 40\text{ }\mu\text{m}$  in length) that are sparsely decorated with smaller particles.

#### indigo crude:

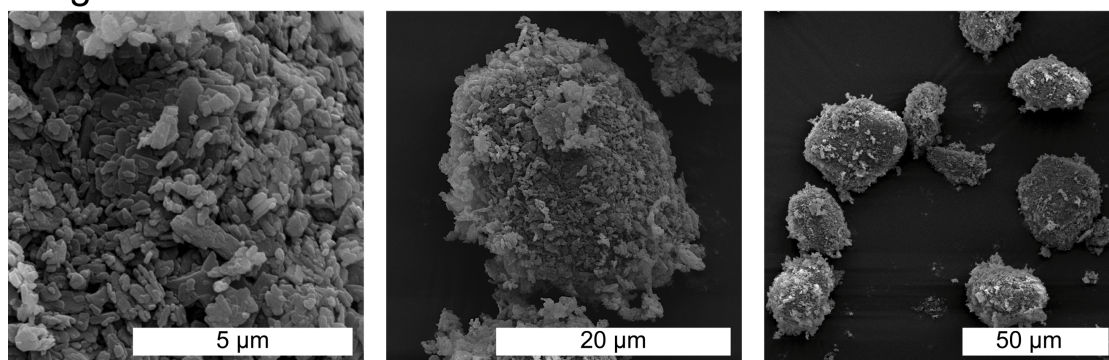

#### indigo crystallized:

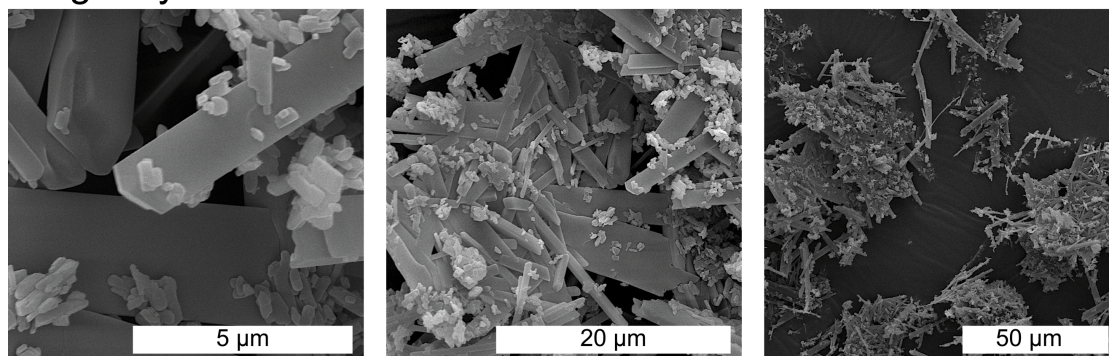

Figure S 37: SEM micrographs of indigo before and after HT treatment (at  $T_R = 250\text{ }^\circ\text{C}$ ,  $t_H = 10\text{ min}$  and  $t_R = 15\text{ min}$ ): HT treatment transforms the initially present agglomerates of small particles (approximately  $0.5 - 2\text{ }\mu\text{m}$  in length) into elongated needles (around  $20 - 40\text{ }\mu\text{m}$  in length).

The SEM micrographs of pentacenetrone before and after HT treatment (at  $T_R = 250\text{ }^\circ\text{C}$ ,  $t_H = 10\text{ min}$  and  $t_R = 15\text{ min}$ ) are shown in Figure S 38. Similar to the previous case, the morphologies of crude pentacenetrone and the crystallized product show non-negligible differences. While the crude compound is composed of angular shaped particles ( $30 - 100\text{ }\mu\text{m}$  in length) that are randomly decorated with smaller, needle-like particles, the crystallized product contains larger, angular particles (mainly  $150 - 400\text{ }\mu\text{m}$ ) that are decorated with small platelates. These platelates show some kind of preferential orientation and alignment.

pentacenetetrone crude:

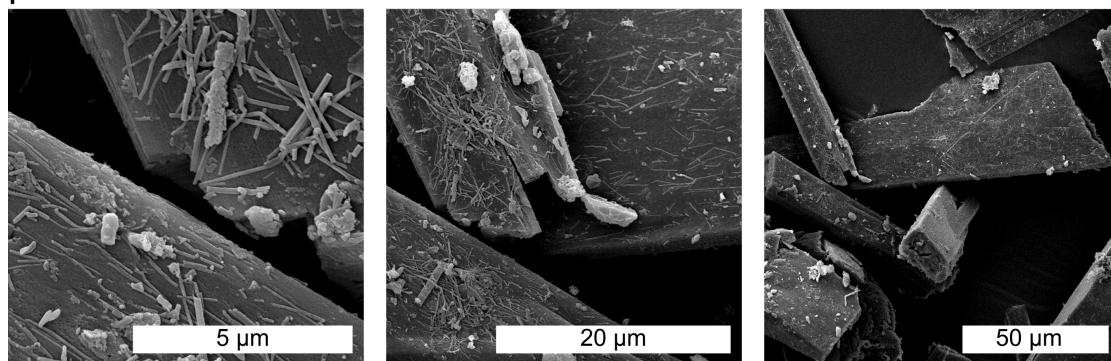

pentacenetetrone crystallized:

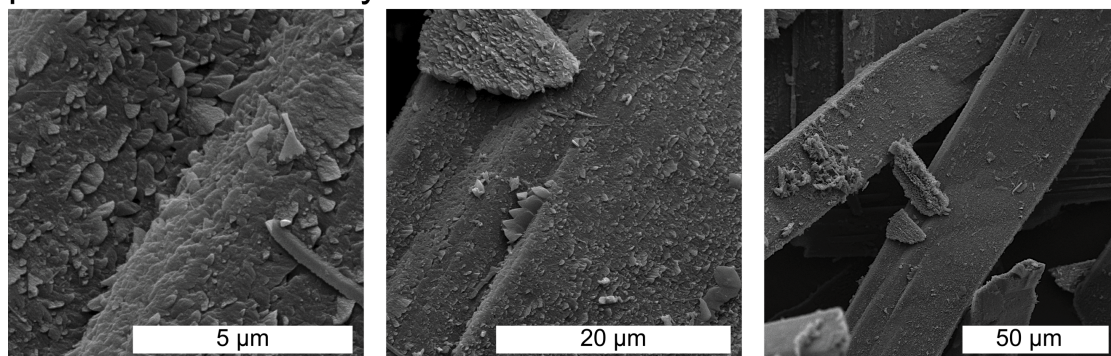

Figure S 38: SEM micrographs of pentacenetetrone before and after HT treatment (at  $T_R = 250$  °C,  $t_H = 10$  min and  $t_R = 15$  min): HT treatment transforms the initial particles (approximately 30 -100 μm in length) with random surface texture into larger particles (mainly 150 – 400 μm in length) with an ordered surface texture.



## 6 References

- <sup>i</sup> Manukian, B. K. (1969). Über Pyromellitsäure-und Cumidinsäure-Derivate. XIV. Teil [1]. Imidazole aus Pyromellitsäure-dianhydrid. *Helvetica Chimica Acta*, 52(7), 2143-2150.
- <sup>ii</sup> Mamada, M., Pérez-Bolívar, C., & Anzenbacher Jr, P. (2011). Green synthesis of polycyclic benzimidazole derivatives and organic semiconductors. *Organic letters*, 13(18), 4882-4885.
- <sup>iii</sup> Cordes, M. M., & Walter, J. L. (1968). Infrared and Raman studies of heterocyclic compounds—II Infrared spectra and normal vibrations of benzimidazole and bis-(benzimidazolato)-metal complexes. *Spectrochimica Acta Part A: Molecular Spectroscopy*, 24(9), 1421-1435.
- <sup>iv</sup> Loutfy, R. O., Hor, A. M., Kazmaier, P. M., Burt, R. A., & Hamer, G. K. (1991). Organic photoconductive (OPC) devices incorporating bisarylimidazole perinone pigments. *Dyes and Pigments*, 15(2), 139-156.
- <sup>v</sup> Teteruk, J. L., Glinnemann, J., Heyse, W., Johansson, K. E., van de Streek, J., & Schmidt, M. U. (2016). Local structure in the disordered solid solution of cis-and trans-perinones. *Acta Crystallographica Section B: Structural Science, Crystal Engineering and Materials*, 72(3), 416-433.
- <sup>vi</sup> Mizuguchi, J. (2004). Crystal structure and electronic characterization of trans-and cis-perinone pigments. *The Journal of Physical Chemistry B*, 108(26), 8926-8930.
- <sup>vii</sup> Laschat, S., Baro, A., Steinke, N., Giesselmann, F., Hägele, C., Scalia, G., & Tosoni, M. (2007). Discotic liquid crystals: from tailor-made synthesis to plastic electronics. *Angewandte Chemie International Edition*, 46(26), 4832-4887.
- <sup>viii</sup> Guengerich, F. P., Sorrells, J. L., Schmitt, S., Krauser, J. A., Aryal, P., & Meijer, L. (2004). Generation of new protein kinase inhibitors utilizing cytochrome P450 mutant enzymes for indigoid synthesis. *Journal of medicinal chemistry*, 47(12), 3236-3241.
